# Supplementary material for: Simple synthesis of new imidazopyridinone, pyridopyrimidinone, and thiazolopyridinone derivatives and optimization of reaction parameters using response surface methodology
Source: Royal Society of Chemistry journal article supplement (doi:10.1039/c9ra06054e), 2019-01-01
Supplement: c9ra06054e1.pdf [file c9ra06054e1.pdf]

# Supporting Information

## Simple synthesis of new imidazopyridinone, pyridopyrimidinone, and thiazolopyridinone derivatives and optimization of reaction parameters using response surface methodology

Fahimeh Sadat Hosseini<sup>a</sup>, Mohammad Bayat<sup>\*a</sup>

<sup>a</sup> Chemistry Department, Imam Khomeini International University, Qazvin, Iran

Tel: +98 (28)33780040; Fax: +98 (28)33780040; E-mail: bayat\_mo@yahoo.com; m.bayat@sci.ikiu.ac.ir

### The Table of Contents

| Title                                                                         | Page  |
|-------------------------------------------------------------------------------|-------|
| Title, author's name, address and table of contents                           | 1     |
| Experimental Section                                                          | 1-2   |
| Figure 1. Structure of all products <b>5</b>                                  | 3     |
| <sup>1</sup> H and <sup>13</sup> C NMR and IR and Mass spectrums of <b>5a</b> | 4-7   |
| <sup>1</sup> H and <sup>13</sup> C NMR and IR and Mass spectrums of <b>5b</b> | 8-11  |
| <sup>1</sup> H and <sup>13</sup> C NMR and IR spectrums of <b>5c</b>          | 12-14 |
| <sup>1</sup> H and <sup>13</sup> C NMR spectrums of <b>5d</b>                 | 15-16 |
| <sup>1</sup> H and <sup>13</sup> C NMR and IR and Mass spectrums of <b>5e</b> | 17-20 |
| <sup>1</sup> H and <sup>13</sup> C NMR and IR and Mass spectrums of <b>5f</b> | 21-24 |
| <sup>1</sup> H and <sup>13</sup> C NMR spectrums of <b>5g</b>                 | 25-26 |
| <sup>1</sup> H and <sup>13</sup> C NMR and IR spectrums of <b>5h</b>          | 27-29 |
| <sup>1</sup> H and <sup>13</sup> C NMR and IR and Mass spectrums of <b>5i</b> | 30-33 |
| <sup>1</sup> H and <sup>13</sup> C NMR spectrums of <b>5j</b>                 | 34-35 |
| <sup>1</sup> H and <sup>13</sup> C NMR spectrums of <b>5k</b>                 | 36-37 |
| <sup>1</sup> H and <sup>13</sup> C NMR spectrums of <b>5l</b>                 | 38-39 |
| <sup>1</sup> H and <sup>13</sup> C NMR spectrums of <b>5m</b>                 | 40-41 |
| <sup>1</sup> H and <sup>13</sup> C NMR spectrums of <b>5n</b>                 | 42    |
| <sup>1</sup> H NMR spectrum of <b>5o</b>                                      | 43-44 |

## Experimental Section

### General

The various diamines, cysteamine hydrochloride, 1,1-bis(methylthio)-2-nitroethene, various aldehydes, 2,2-dimethyl-1,3-dioxane-4,6-dione (Meldrum's acid) and solvents were purchased from Sigma-Aldrich chemical company and were used as received without further purification. Melting points were determined with an electrothermal 9100 apparatus. Infrared (IR) spectra were recorded on a Bruker Tensor 27 spectrometer. Nuclear magnetic resonance (NMR) spectra were obtained on a Bruker DRX-300 Avance instrument (300 MHz for  $^1\text{H}$  and 75.4 MHz for  $^{13}\text{C}$ ) with DMSO as solvent. Chemical shifts are expressed in parts per million (ppm), and coupling constant ( $J$ ) are reported in hertz (Hz). Elemental analyses for C, H and N were performed using a PerkinElmer 2004 series [II] CHN elemental analyzer. Mass spectra were recorded with an Agilent 5975C VL MSD with Triple-Axis Detector operating at an ionization potential of 70 eV.

### General procedure for the synthesis of product 5.

**Synthesis of imidazopyridinone and pyridopyrimidinone derivatives:** The mixtures of various diamines (1 mmol), 1,1-bis(methylthio)-2-nitroethene (0.165 g, 1 mmol) and 10 mL EtOH/H<sub>2</sub>O (2:1) at 72 °C in a 50 mL flask was stirred for 6 h. After completion of the reaction (monitored by thin-layer chromatography, hexane/ethyl acetate 1:1), aromatic aldehyde (1 mmol), 2,2-dimethyl-1,3-dioxane-4,6-dione (Meldrum's acid) (0.144 g, 1 mmol) were added to the reaction mixture, and it was stirred under optimized condition for the time given in Table 4. Then, the reaction mixture was cooled to room temperature and filtered to give the crude product. The solid was washed with ethanol to give product in good yields.

**Synthesis of thiazolopyridinone derivatives:** The mixtures of cysteamine hydrochloride (0.113 g, 1 mmol), 1,1-bis(methylthio)-2-nitroethene (0.165 g, 1 mmol), 10 mL EtOH/H<sub>2</sub>O (2:1), and Et<sub>3</sub>N (140  $\mu\text{L}$ , 1 mmol) at 72 °C in a 50 mL flask was stirred for 5 h. After completion of the reaction (monitored by thin-layer chromatography, hexane/ethyl acetate 1:1), aromatic aldehyde (1 mmol), 2,2-dimethyl-1,3-dioxane-4,6-dione (Meldrum's acid) (0.144 g, 1 mmol) were added to the reaction mixture, and it was stirred under optimized condition for the time given in Table 4. The reaction mixture was monitored by thin layer chromatography (hexane/ethyl acetate 1:1); after completion of the reaction, the reaction mixture was cooled to room temperature and the product (as colorless crystal) was filtered. The solid was washed with ethanol to give product in moderate yields.

The structures all of the products **5a-o** (figure 1) were deduced from their IR, Mass,  $^1\text{H}$  NMR, and  $^{13}\text{C}$  NMR spectra.

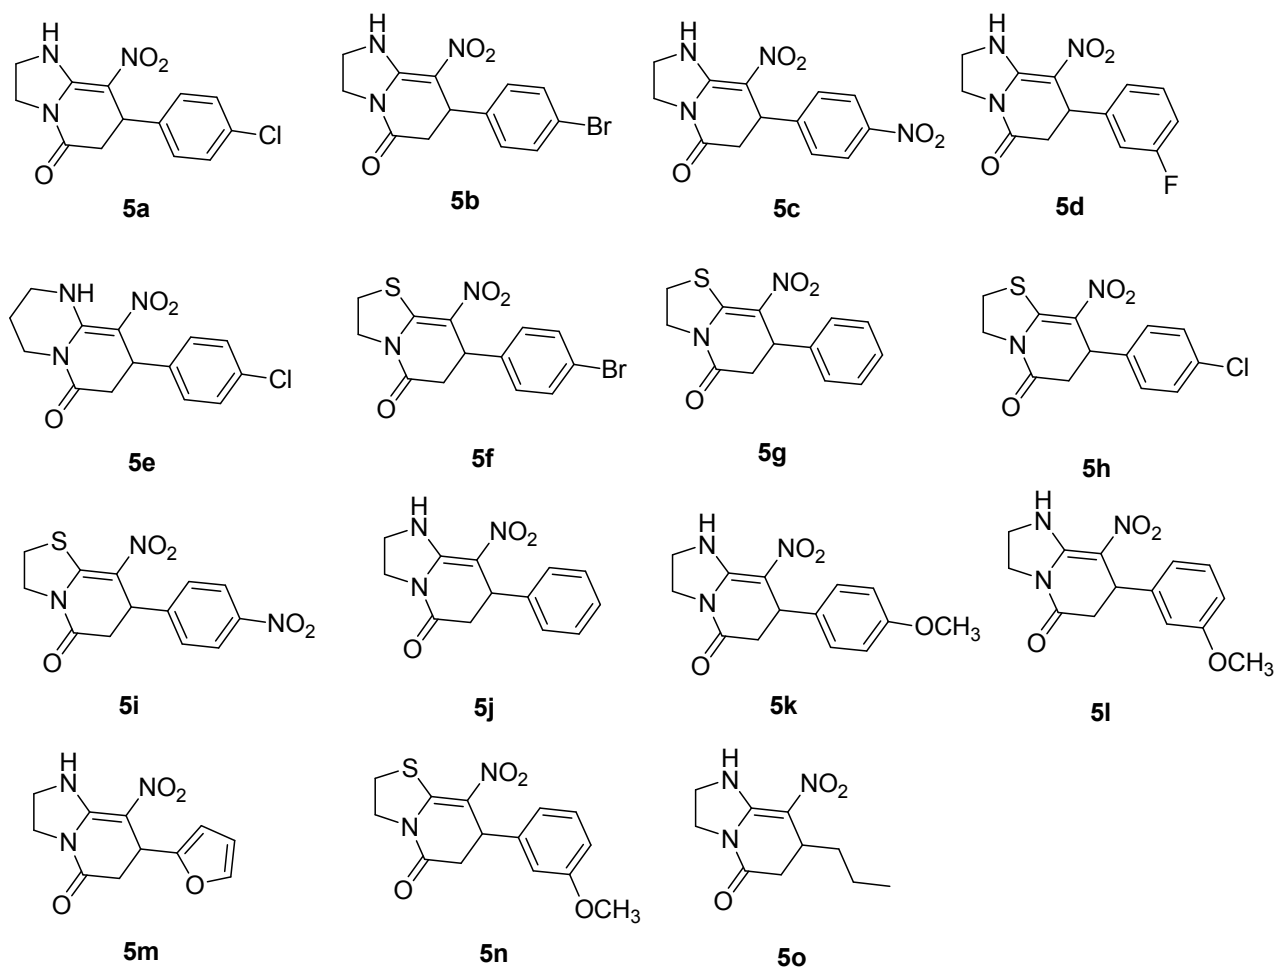

Figure 1. Structure of all products 5.

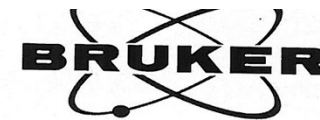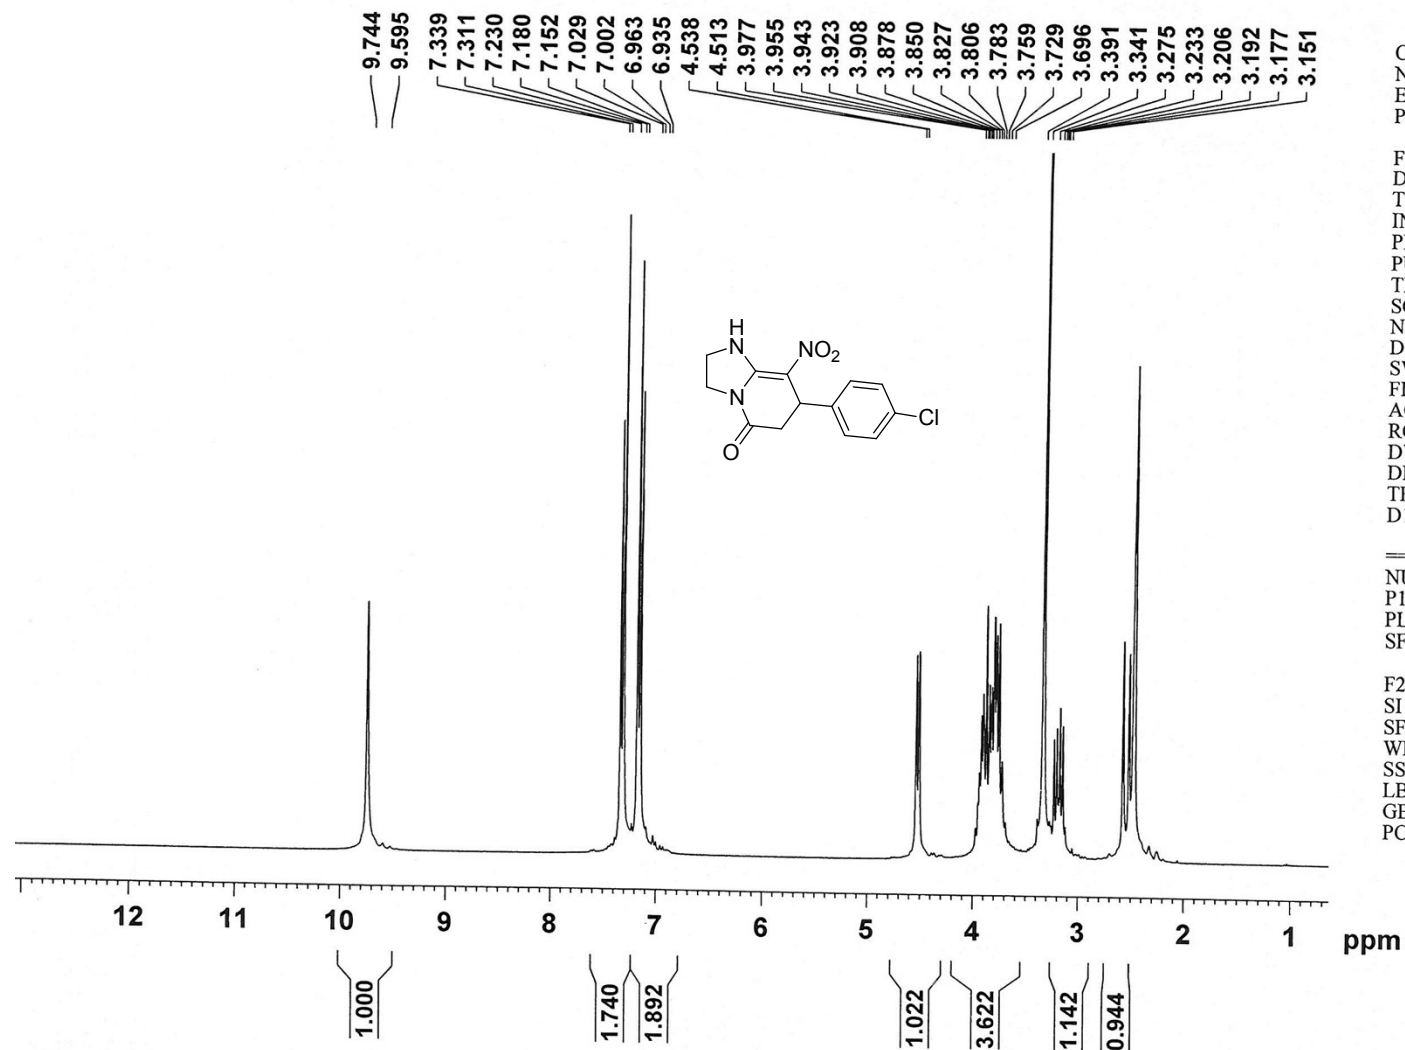<sup>1</sup>H NMR of 5a

Current Data Parameters  
 NAME F.Hoseyni  
 EXPNO 723  
 PROCNO 1

F2 - Acquisition Parameters  
 Date\_ 20170303  
 Time 8.01  
 INSTRUM spect  
 PROBHD 5 mm BBO BB-1H  
 PULPROG zg  
 TD 16384  
 SOLVENT DMSO  
 NS 6  
 DS 0  
 SWH 5995.204 Hz  
 FIDRES 0.365918 Hz  
 AQ 1.3664756 sec  
 RG 128  
 DW 83.400 usec  
 DE 6.00 usec  
 TE 300.0 K  
 D1 6.00000000 sec

==== CHANNEL f1 ====  
 NUC1 1H  
 P1 9.00 usec  
 PL1 3.00 dB  
 SFO1 299.8729987 MHz

F2 - Processing parameters  
 SI 32768  
 SF 299.8700035 MHz  
 WDW EM  
 SSB 0  
 LB 0.30 Hz  
 GB 0  
 PC 1.00



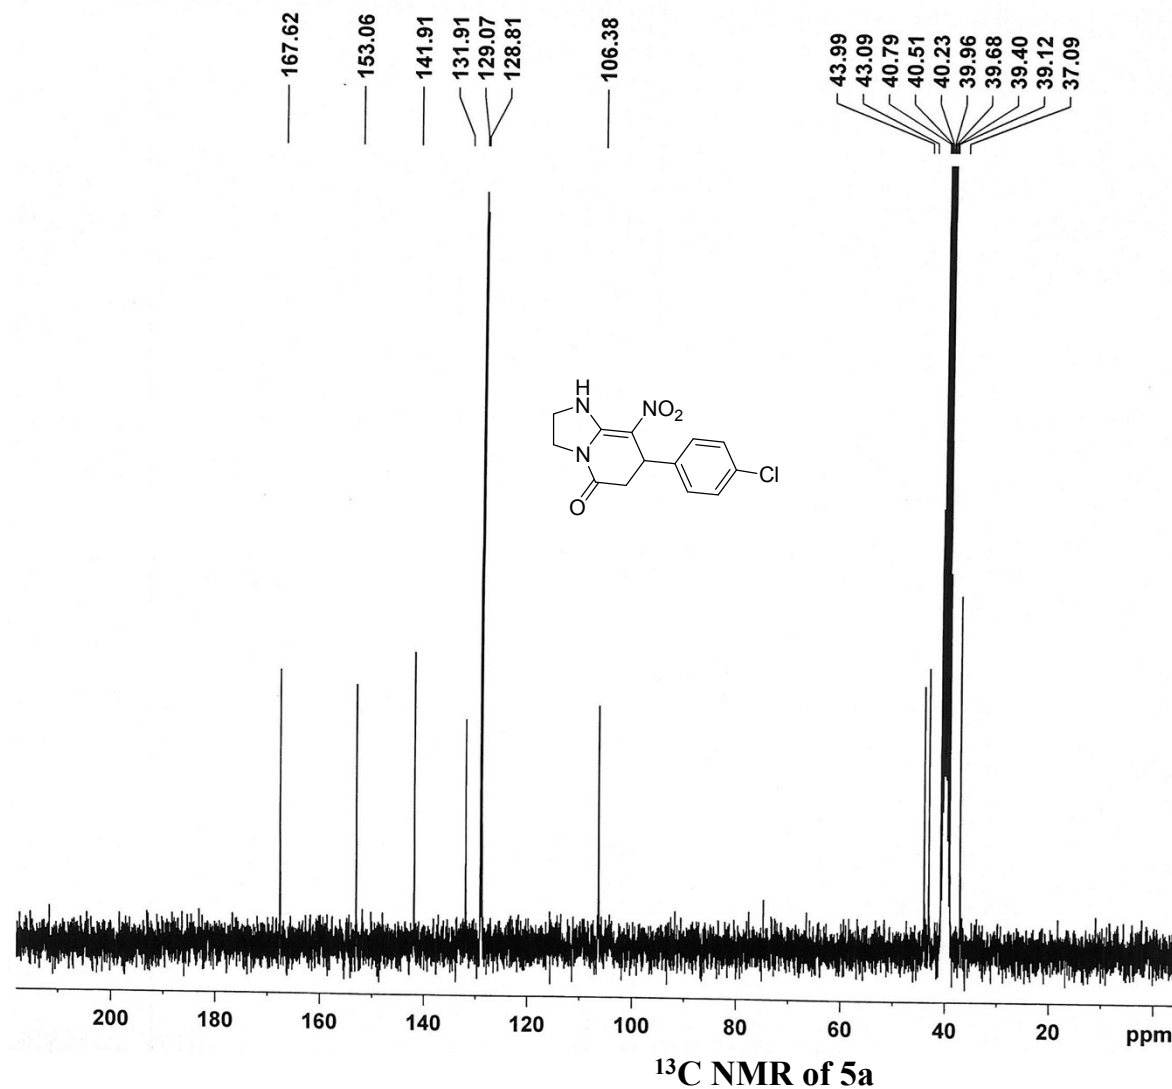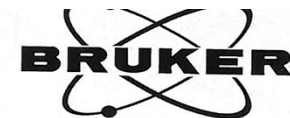

Current Data Parameters  
 NAME F.Hoseyni  
 EXPNO 728  
 PROCNO 1

F2 - Acquisition Parameters  
 Date\_ 20170304  
 Time\_ 15.13  
 INSTRUM spect  
 PROBHD 5 mm BBO BB-1H  
 PULPROG zgpg  
 TD 65536  
 SOLVENT DMSO  
 NS 405  
 DS 0  
 SWH 17985.611 Hz  
 FIDRES 0.274439 Hz  
 AQ 1.8219508 sec  
 RG 32768  
 DW 27.800 usec  
 DE 6.00 usec  
 TE 300.0 K  
 D1 4.00000000 sec  
 d11 0.03000000 sec  
 d12 0.00002000 sec

===== CHANNEL f1 =====  
 NUC1 13C  
 P1 14.00 usec  
 PL1 -6.00 dB  
 SFO1 75.4099117 MHz

===== CHANNEL f2 =====  
 CPDPRG2 waltz16  
 NUC2 1H  
 PCPD2 80.00 usec  
 PL2 3.00 dB  
 PL12 23.00 dB  
 PL13 23.00 dB  
 SFO2 299.8711995 MHz

F2 - Processing parameters  
 SI 32768  
 SF 75.4023710 MHz  
 WDW EM  
 SSB 0  
 LB 1.00 Hz

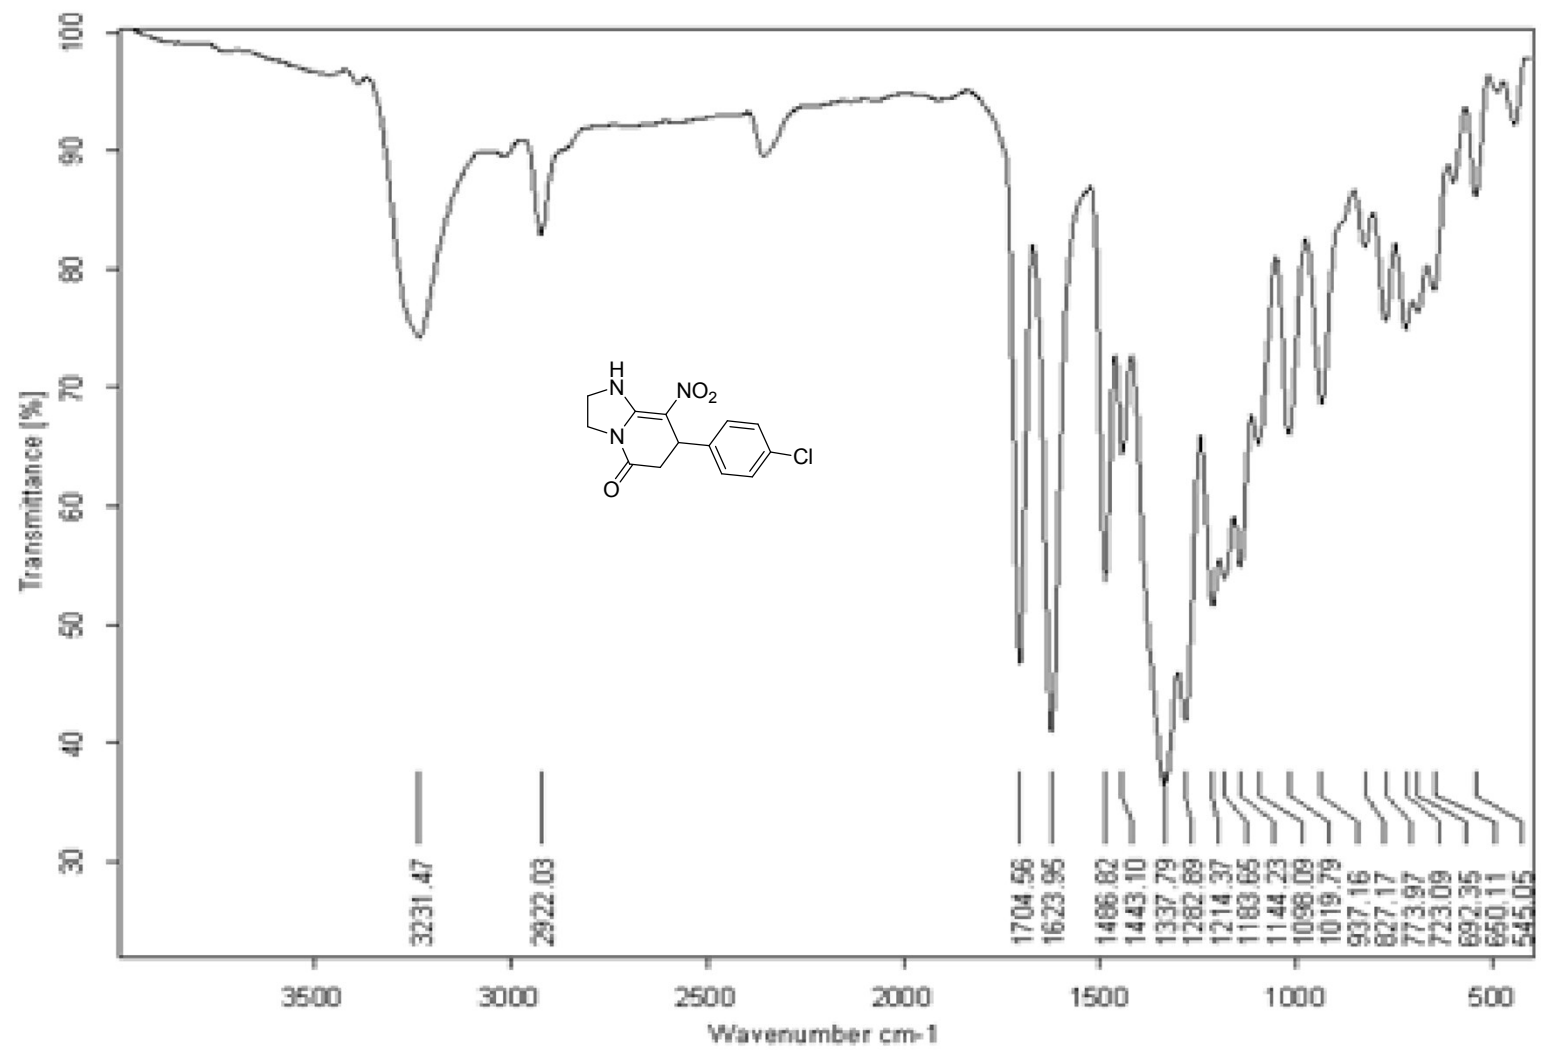

IR of 5a

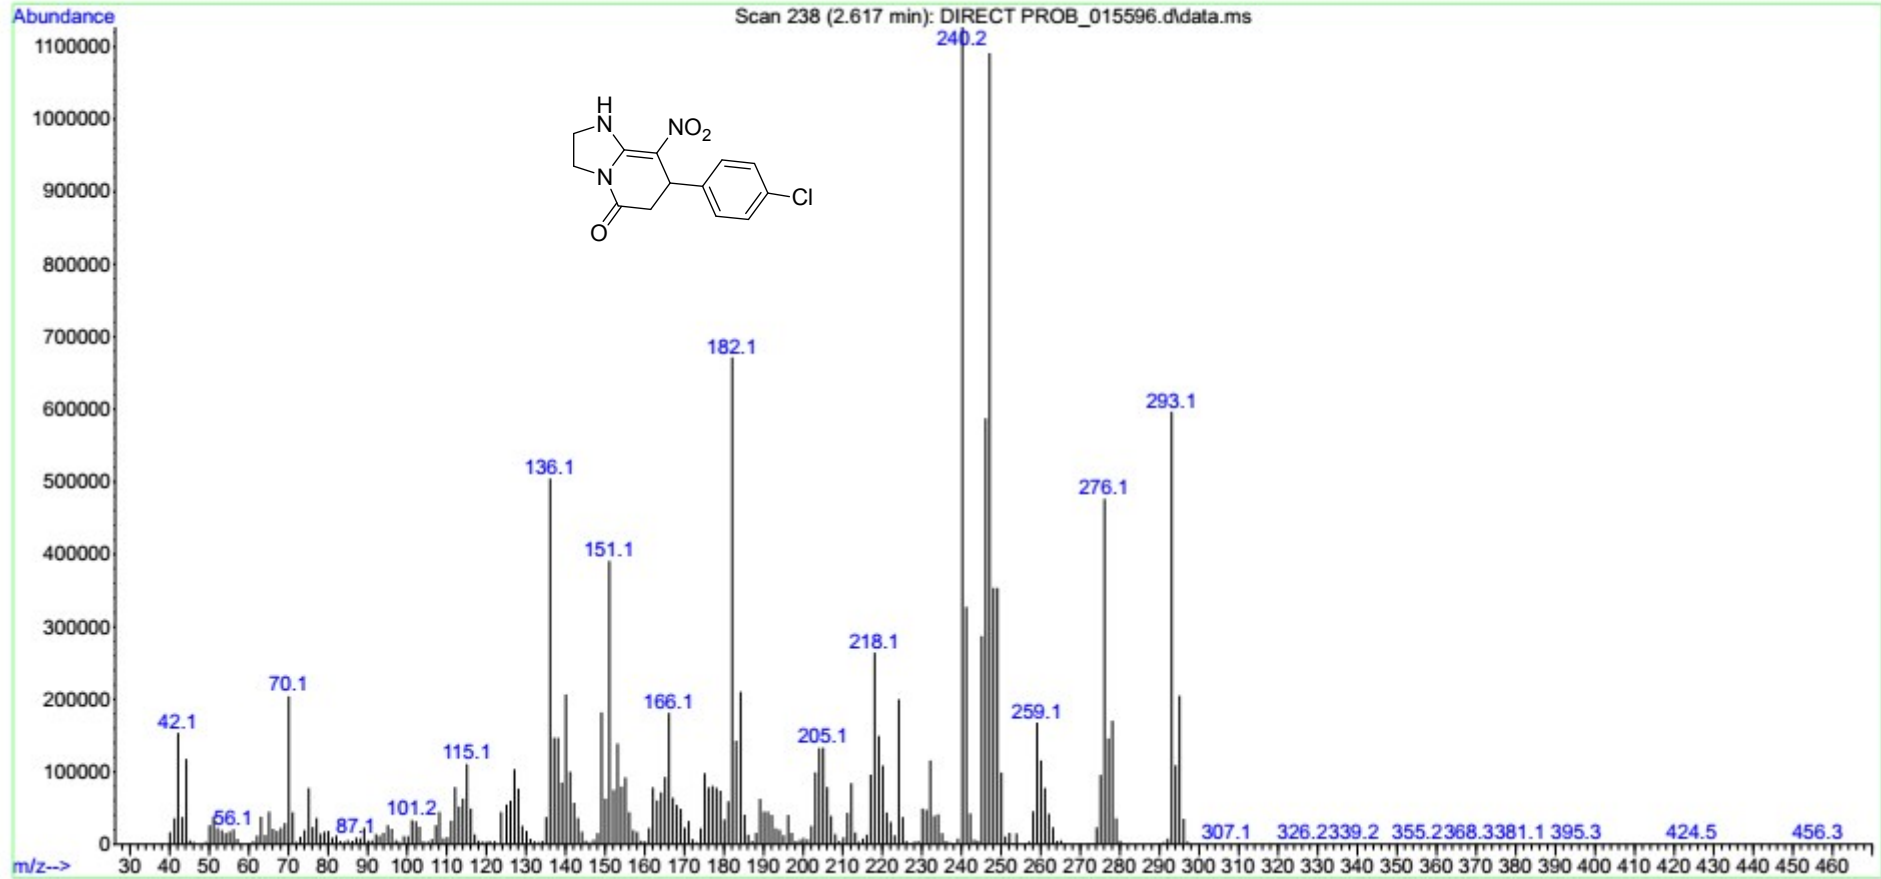

Mass of 5a

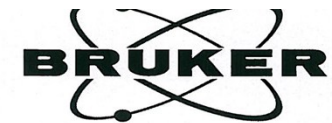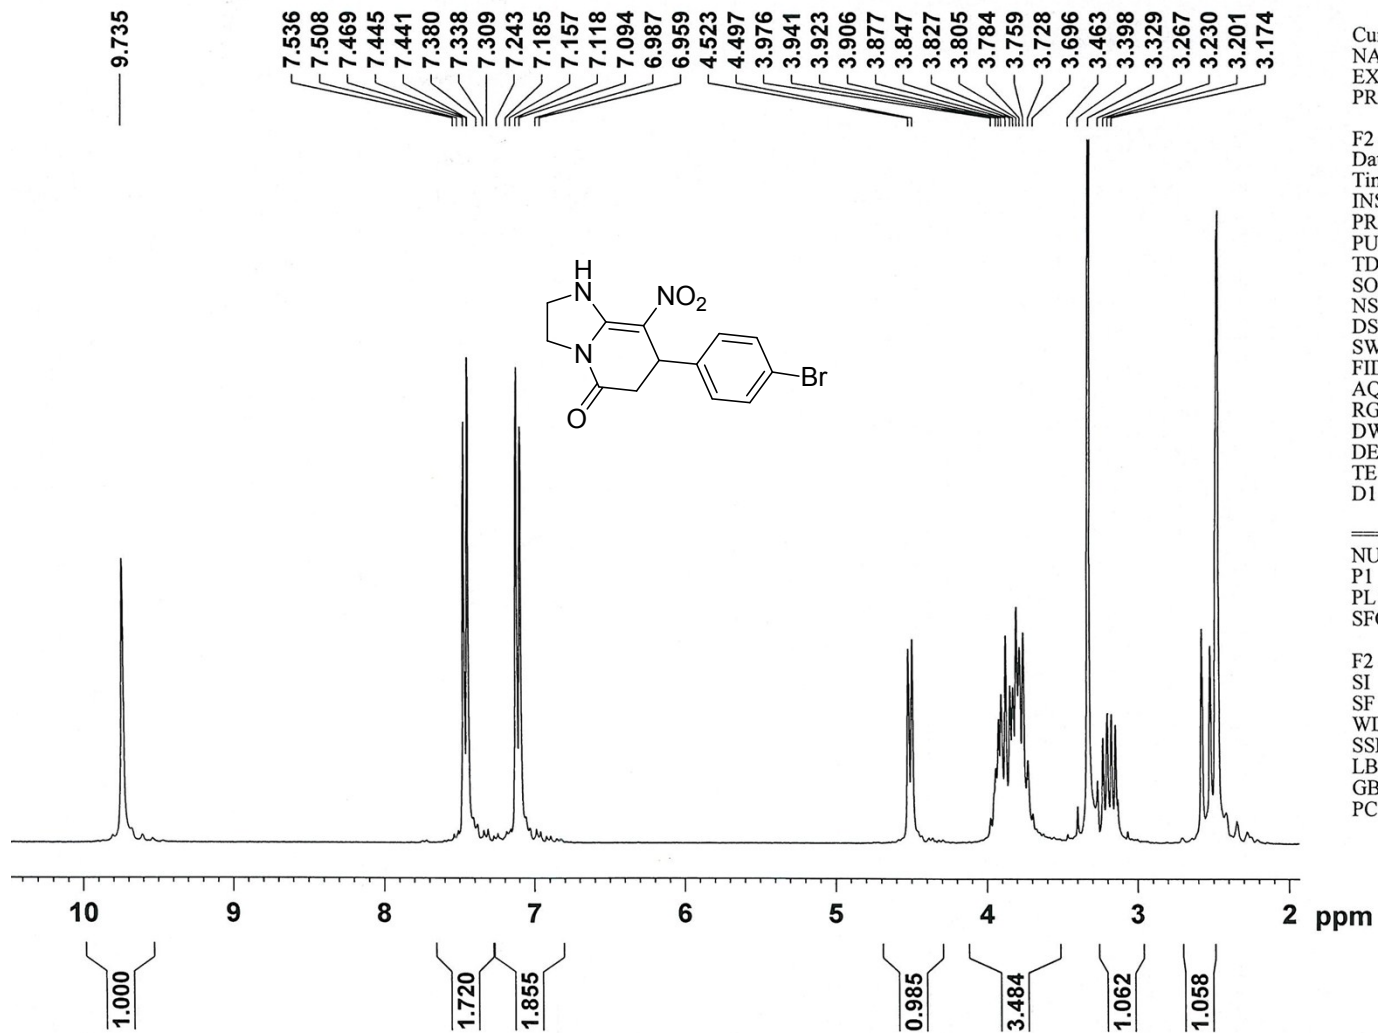

<sup>1</sup>H NMR of 5b

Current Data Parameters  
 NAME F.Hoseyni  
 EXPNO 721  
 PROCNO 1

F2 - Acquisition Parameters  
 Date\_ 20170226  
 Time 13.47  
 INSTRUM spect  
 PROBHD 5 mm BBO BB-1  
 PULPROG zg  
 TD 16384  
 SOLVENT DMSO  
 NS 6  
 DS 0  
 SWH 5995.204 Hz  
 FIDRES 0.365918 Hz  
 AQ 1.3664756 sec  
 RG 128  
 DW 83.400 usec  
 DE 6.00 usec  
 TE 300.0 K  
 D1 6.00000000 sec

CHANNEL f1 ==  
 NUC1 1H  
 P1 9.00 usec  
 PL1 3.00 dB  
 SFO1 299.8729987 MHz

F2 - Processing parameters  
 SI 32768  
 SF 299.8700035 MHz  
 WDW EM  
 SSB 0  
 LB 0.30 Hz  
 GB 0  
 PC 1.00

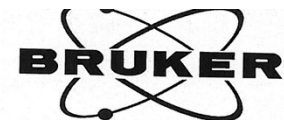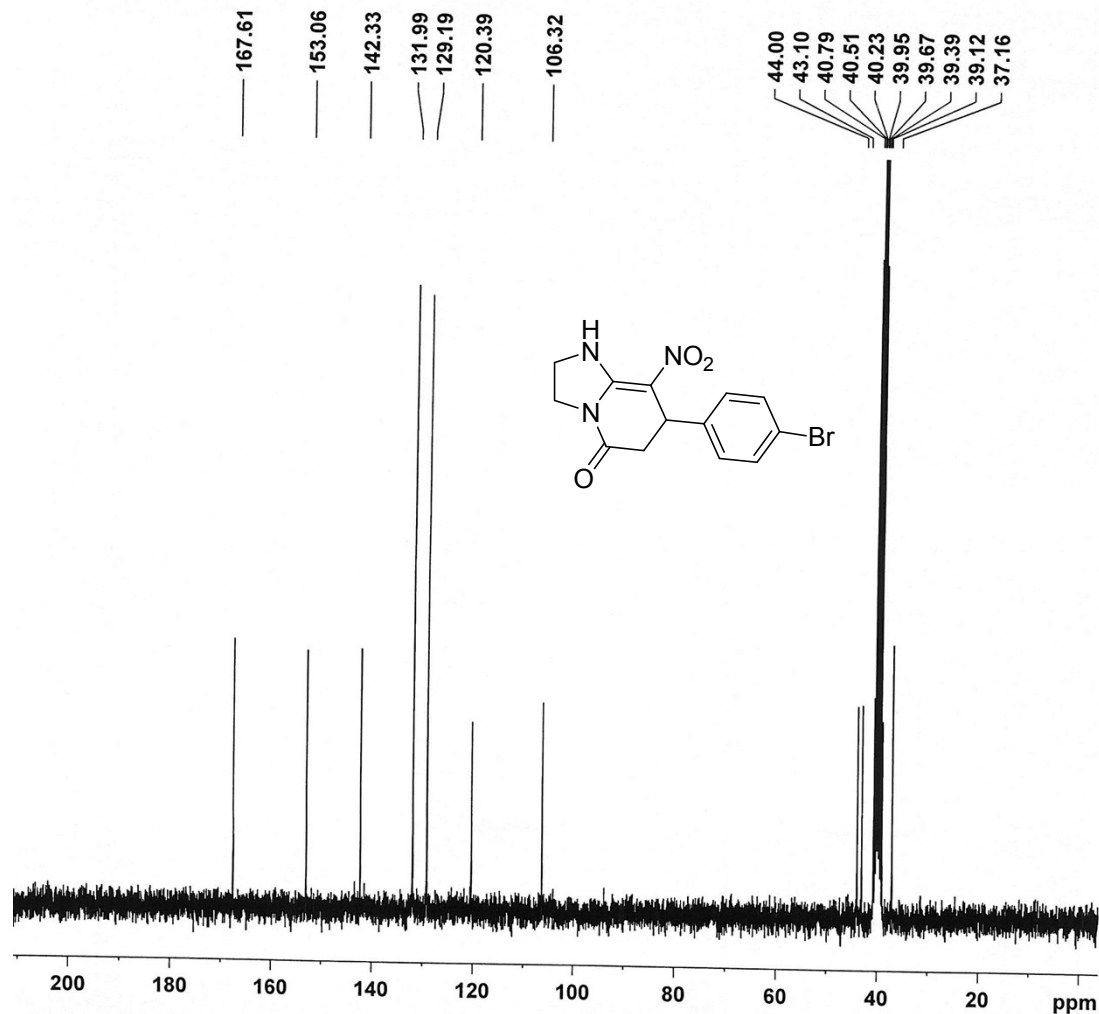 $^{13}\text{C}$  NMR of 5b

Current Data Parameters  
 NAME F.Hoseyni  
 EXPNO 727  
 PROCNO 1

F2 - Acquisition Parameters  
 Date\_ 20170304  
 Time\_ 10.23  
 INSTRUM spect  
 PROBHD 5 mm BBO BB-1H  
 PULPROG zgpg  
 TD 65536  
 SOLVENT DMSO  
 NS 200  
 DS 0  
 SWH 17985.611 Hz  
 FIDRES 0.274439 Hz  
 AQ 1.8219508 sec  
 RG 32768  
 DW 27.800 usec  
 DE 6.00 usec  
 TE 300.0 K  
 D1 4.0000000 sec  
 d11 0.0300000 sec  
 d12 0.0000200 sec

==== CHANNEL f1 =====  
 NUC1 13C  
 P1 14.00 usec  
 PL1 -6.00 dB  
 SFO1 75.4099117 MHz

==== CHANNEL f2 =====  
 CPDPRG2 waltz16  
 NUC2 1H  
 PCPD2 80.00 usec  
 PL2 3.00 dB  
 PL12 23.00 dB  
 PL13 23.00 dB  
 SFO2 299.8711995 MHz

F2 - Processing parameters  
 SI 32768  
 SF 75.4023710 MHz  
 WDW EM  
 SSB 0  
 LB 1.00 Hz  
 CR

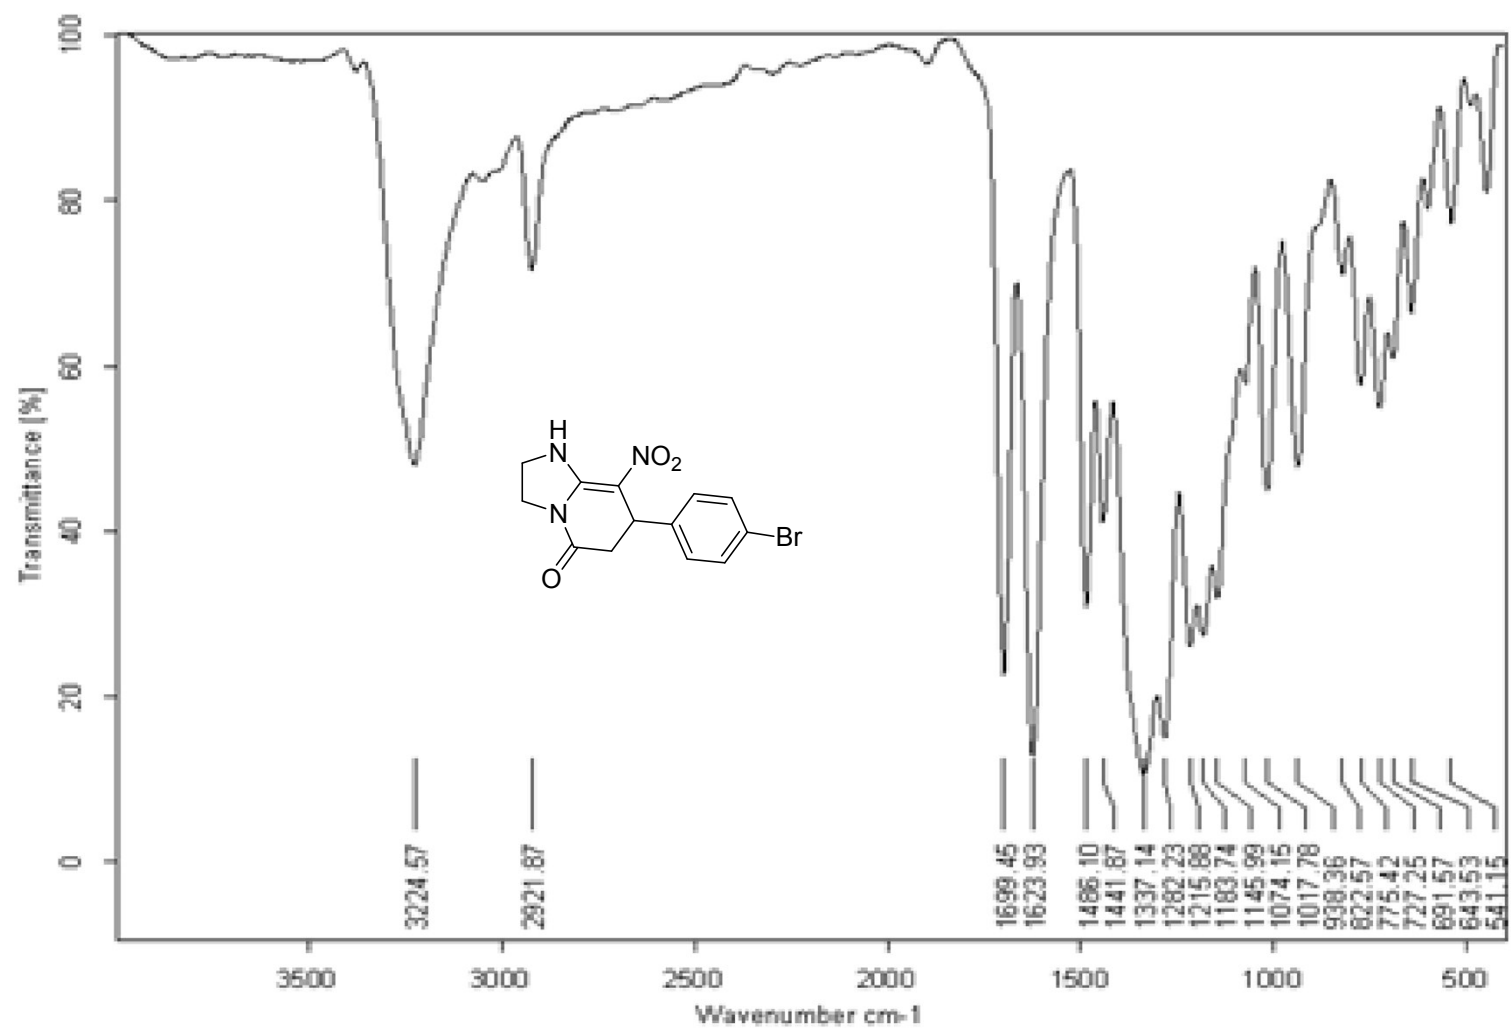

IR of 5b

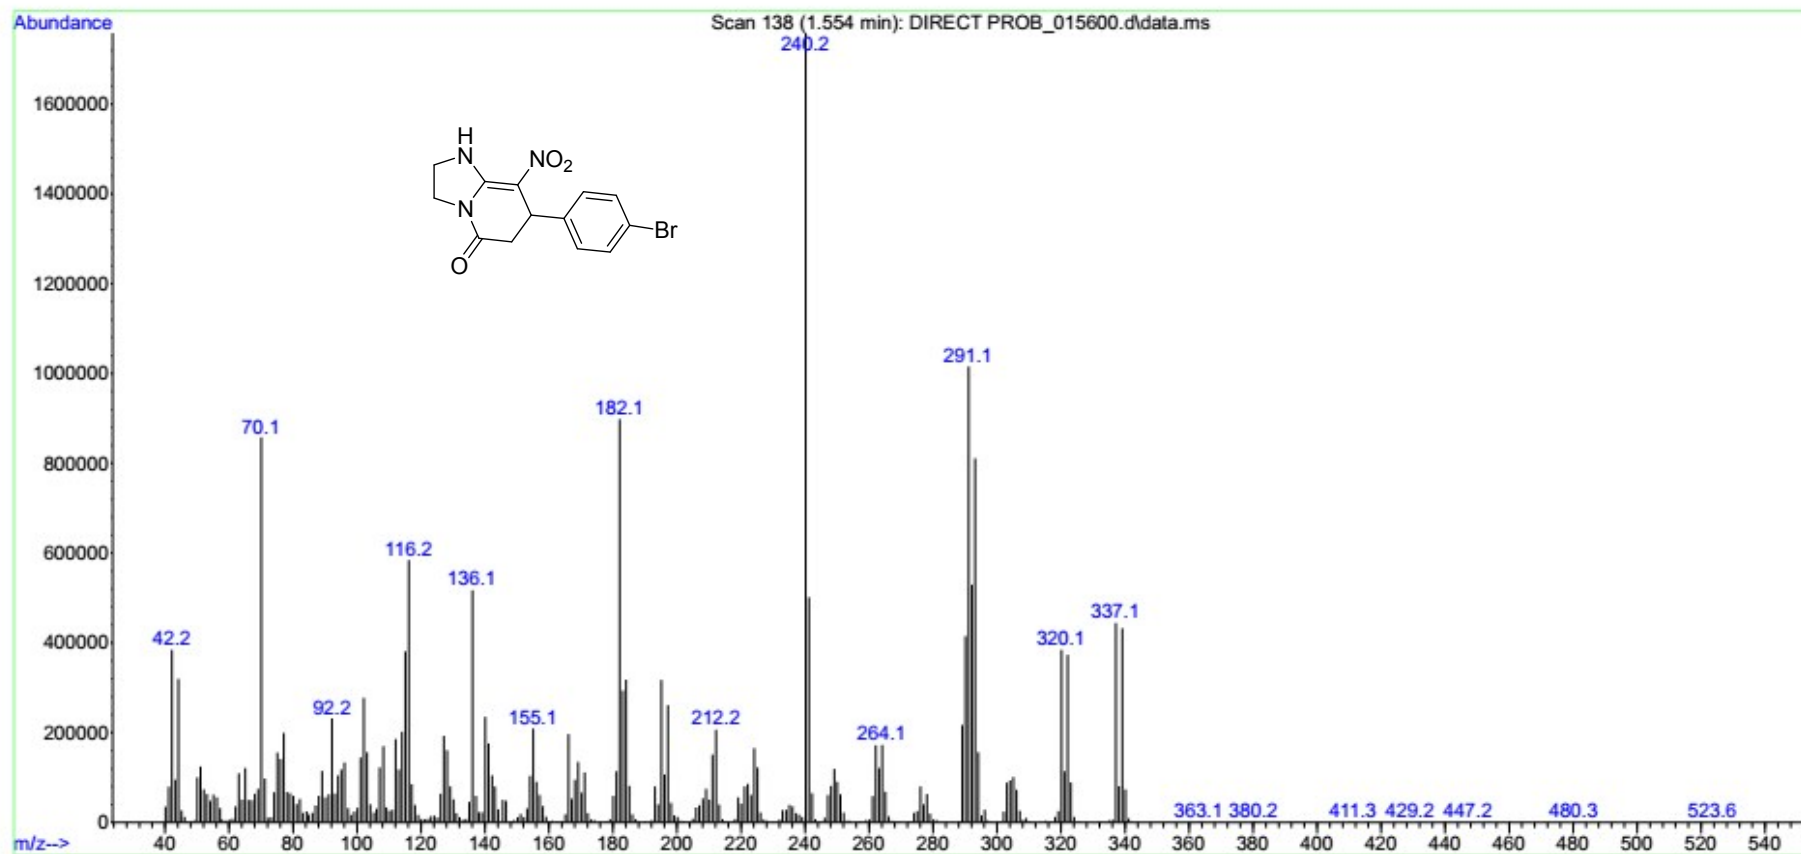

Mass of 5b

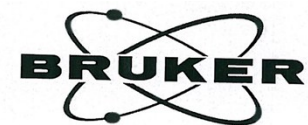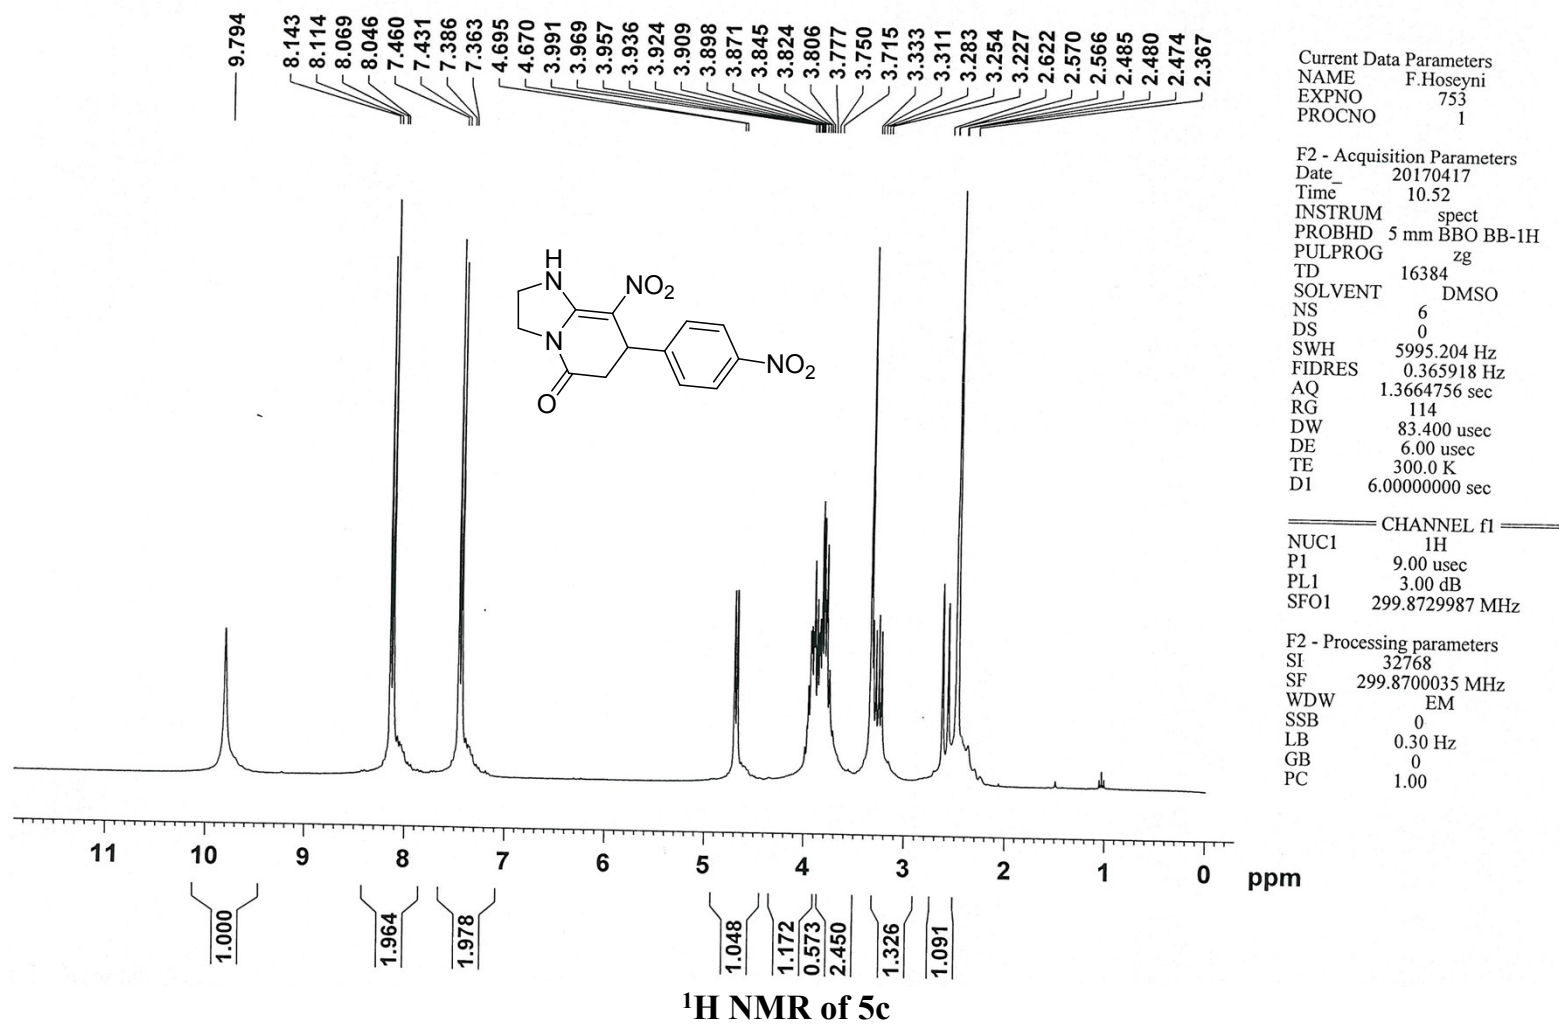



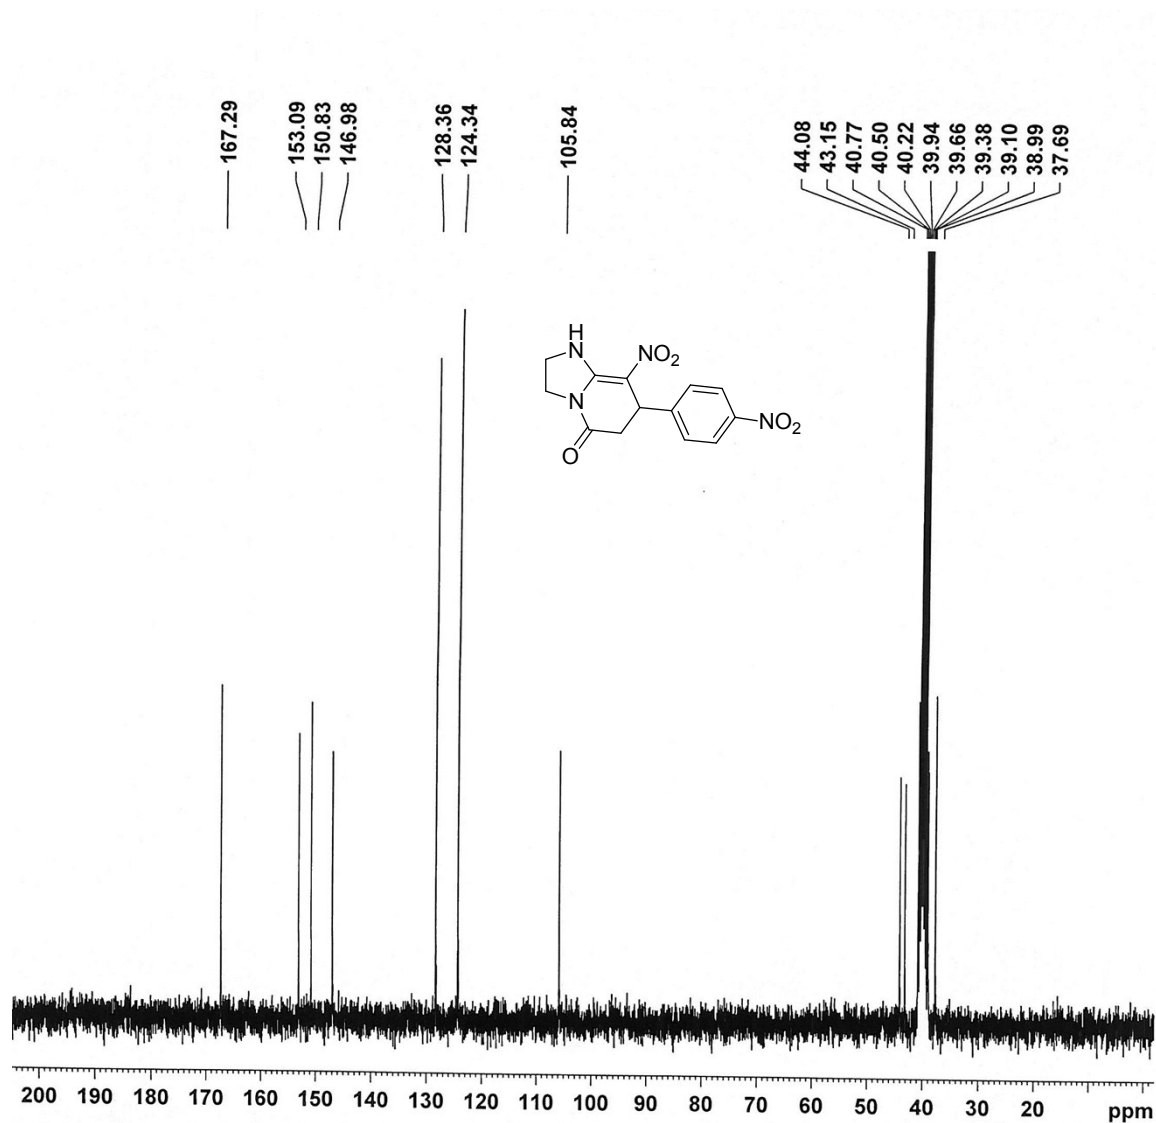<sup>13</sup>C NMR of 5c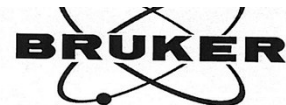

Current Data Parameters  
 NAME F.Hoseyni  
 EXPNO 762  
 PROCNO 1

F2 - Acquisition Parameters  
 Date\_ 20170423  
 Time\_ 9.20  
 INSTRUM spect  
 PROBHD 5 mm BBO BB-1H  
 PULPROG zgpg  
 TD 65536  
 SOLVENT DMSO  
 NS 250  
 DS 0  
 SWH 17985.611 Hz  
 FIDRES 0.274439 Hz  
 AQ 1.8219508 sec  
 RG 32768  
 DW 27.800 usec  
 DE 6.00 usec  
 TE 300.0 K  
 D1 4.0000000 sec  
 d11 0.0300000 sec  
 d12 0.0000200 sec

===== CHANNEL f1 =====  
 NUC1 13C  
 P1 14.00 usec  
 PL1 -6.00 dB  
 SFO1 75.4099117 MHz

===== CHANNEL f2 =====  
 CPDPRG2 waltz16  
 NUC2 1H  
 PCPD2 80.00 usec  
 PL2 3.00 dB  
 PL12 23.00 dB  
 PL13 23.00 dB  
 SFO2 299.8711995 MHz

F2 - Processing parameters  
 SI 32768  
 SF 75.4023710 MHz  
 WDW EM  
 SSB 0  
 LB 1.00 Hz  
 GB 0

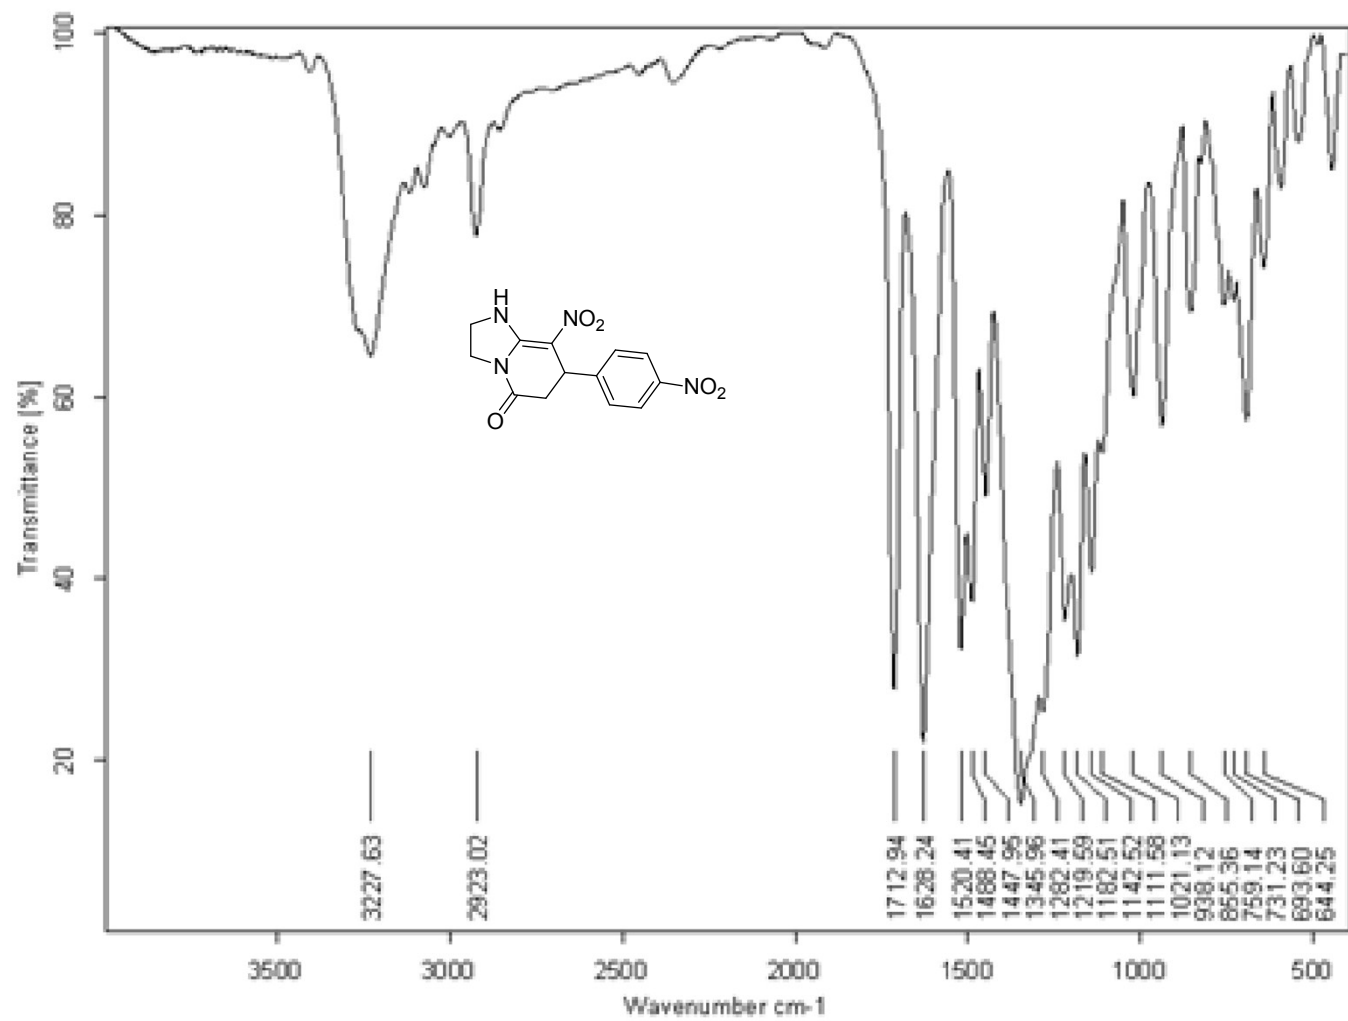

IR of 5c

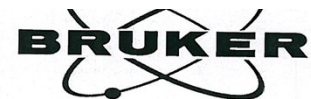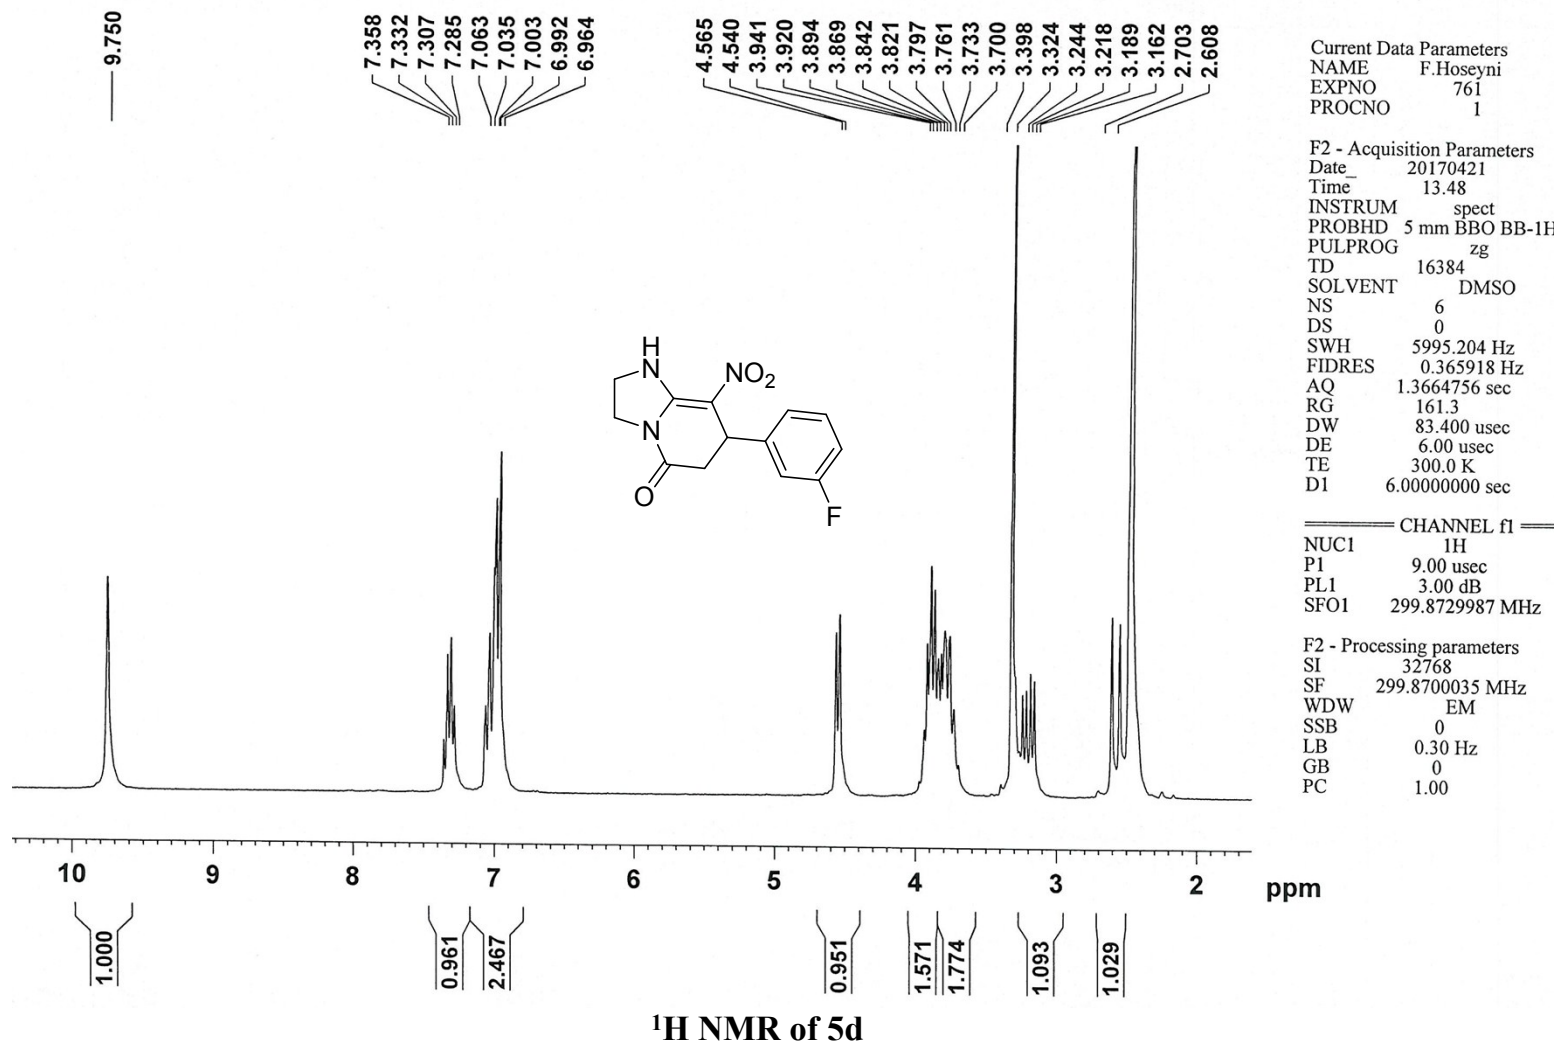

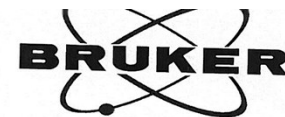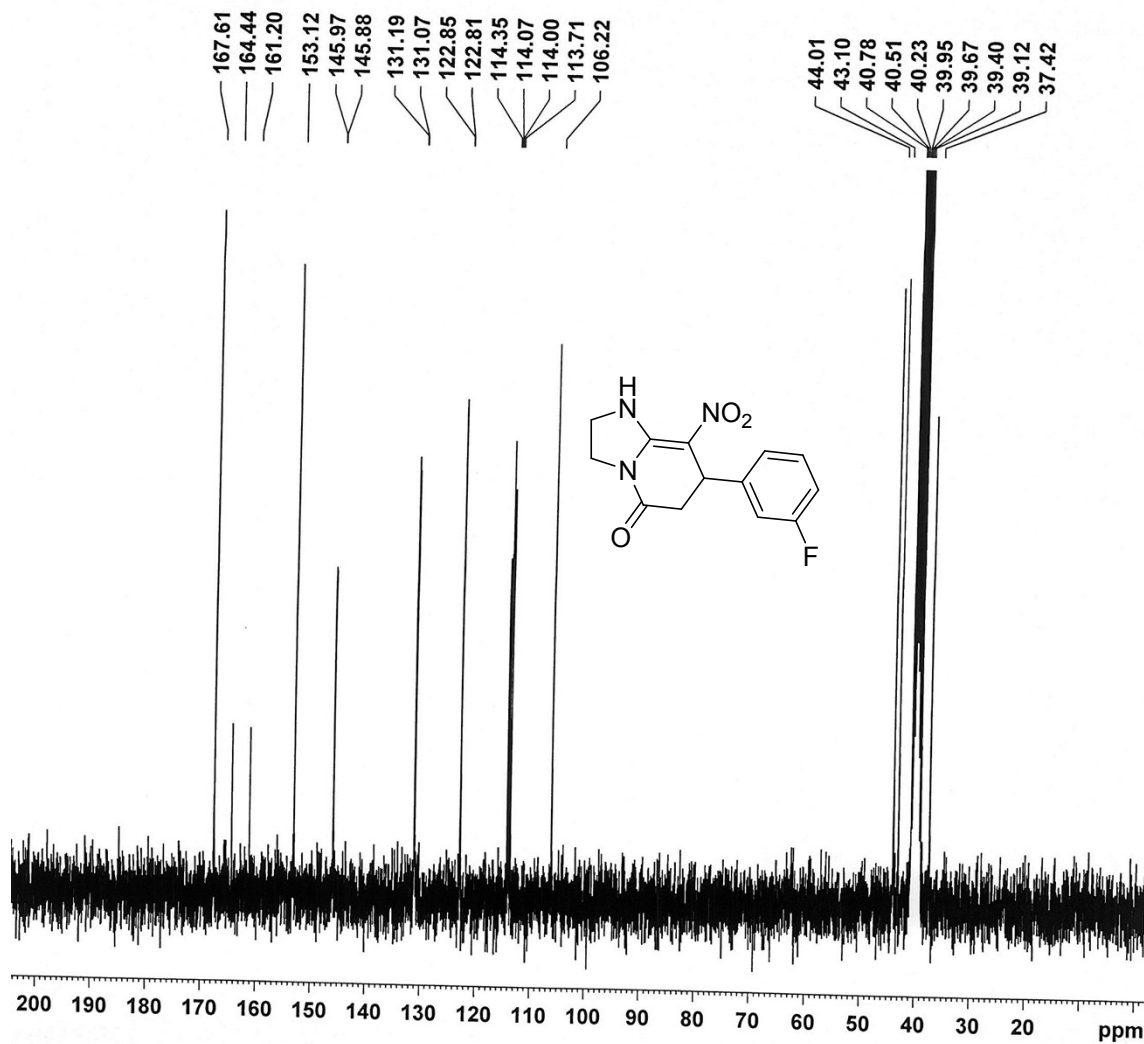

Current Data Parameters  
 NAME F.Hoseyni  
 EXPNO 764  
 PROCNO 1

F2 - Acquisition Parameters  
 Date\_ 20170423  
 Time\_ 10.51  
 INSTRUM spect  
 PROBHD 5 mm BBO BB-1H  
 PULPROG zgpg  
 TD 65536  
 SOLVENT DMSO  
 NS 500  
 DS 0  
 SWH 17985.611 Hz  
 FIDRES 0.274439 Hz  
 AQ 1.8219508 sec  
 RG 32768  
 DW 27.800 usec  
 DE 6.00 usec  
 TE 300.0 K  
 D1 4.0000000 sec  
 d11 0.0300000 sec  
 d12 0.0000200 sec

==== CHANNEL f1 =====  
 NUC1 13C  
 P1 14.00 usec  
 PL1 -6.00 dB  
 SFO1 75.4099117 MHz

==== CHANNEL f2 =====  
 CPDPRG2 waltz16  
 NUC2 1H  
 PCPD2 80.00 usec  
 PL2 3.00 dB  
 PL12 23.00 dB  
 PL13 23.00 dB  
 SFO2 299.8711995 MHz

F2 - Processing parameters  
 SI 32768  
 SF 75.4023710 MHz  
 WDW EM  
 SSB 0  
 LB 1.00 Hz

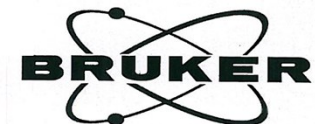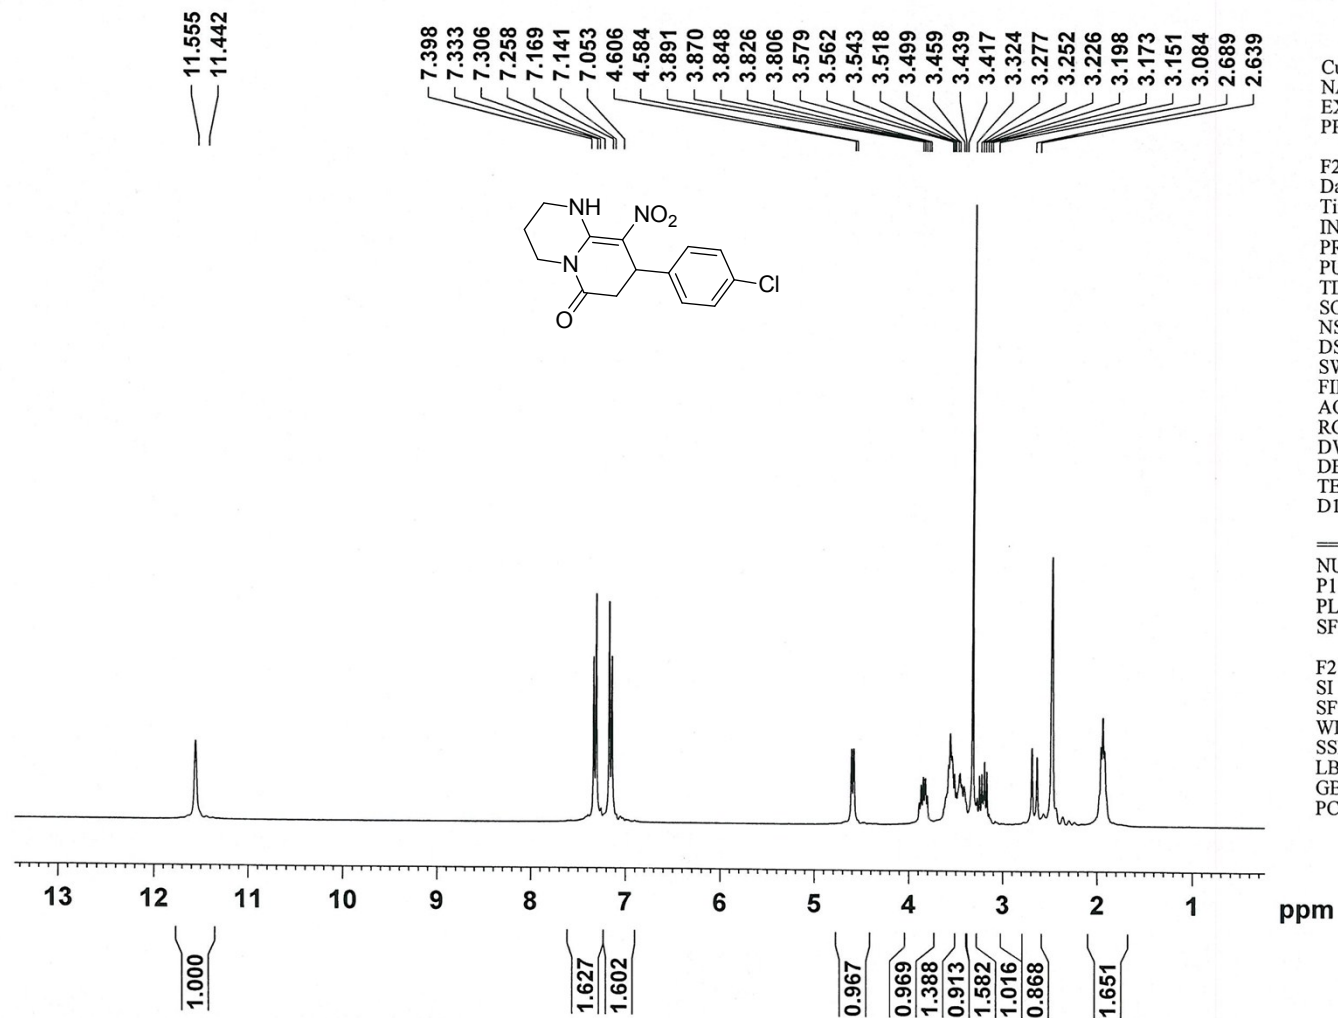

Current Data Parameters  
 NAME F.Hoseyni  
 EXPNO 731  
 PROCNO 1

F2 - Acquisition Parameters  
 Date\_ 20170305  
 Time 15.53  
 INSTRUM spect  
 PROBHD 5 mm BBO BB-1H  
 PULPROG zg  
 TD 16384  
 SOLVENT DMSO  
 NS 6  
 DS 0  
 SWH 5995.204 Hz  
 FIDRES 0.365918 Hz  
 AQ 1.3664756 sec  
 RG 181  
 DW 83.400 usec  
 DE 6.00 usec  
 TE 300.0 K  
 D1 6.00000000 sec

CHANNEL f1  
 NUC1 1H  
 P1 9.00 usec  
 PL1 3.00 dB  
 SFO1 299.8729987 MHz

F2 - Processing parameters  
 SI 32768  
 SF 299.8700035 MHz  
 WDW EM  
 SSB 0  
 LB 0.30 Hz  
 GB 0  
 PC 1.00

<sup>1</sup>H NMR of 5e

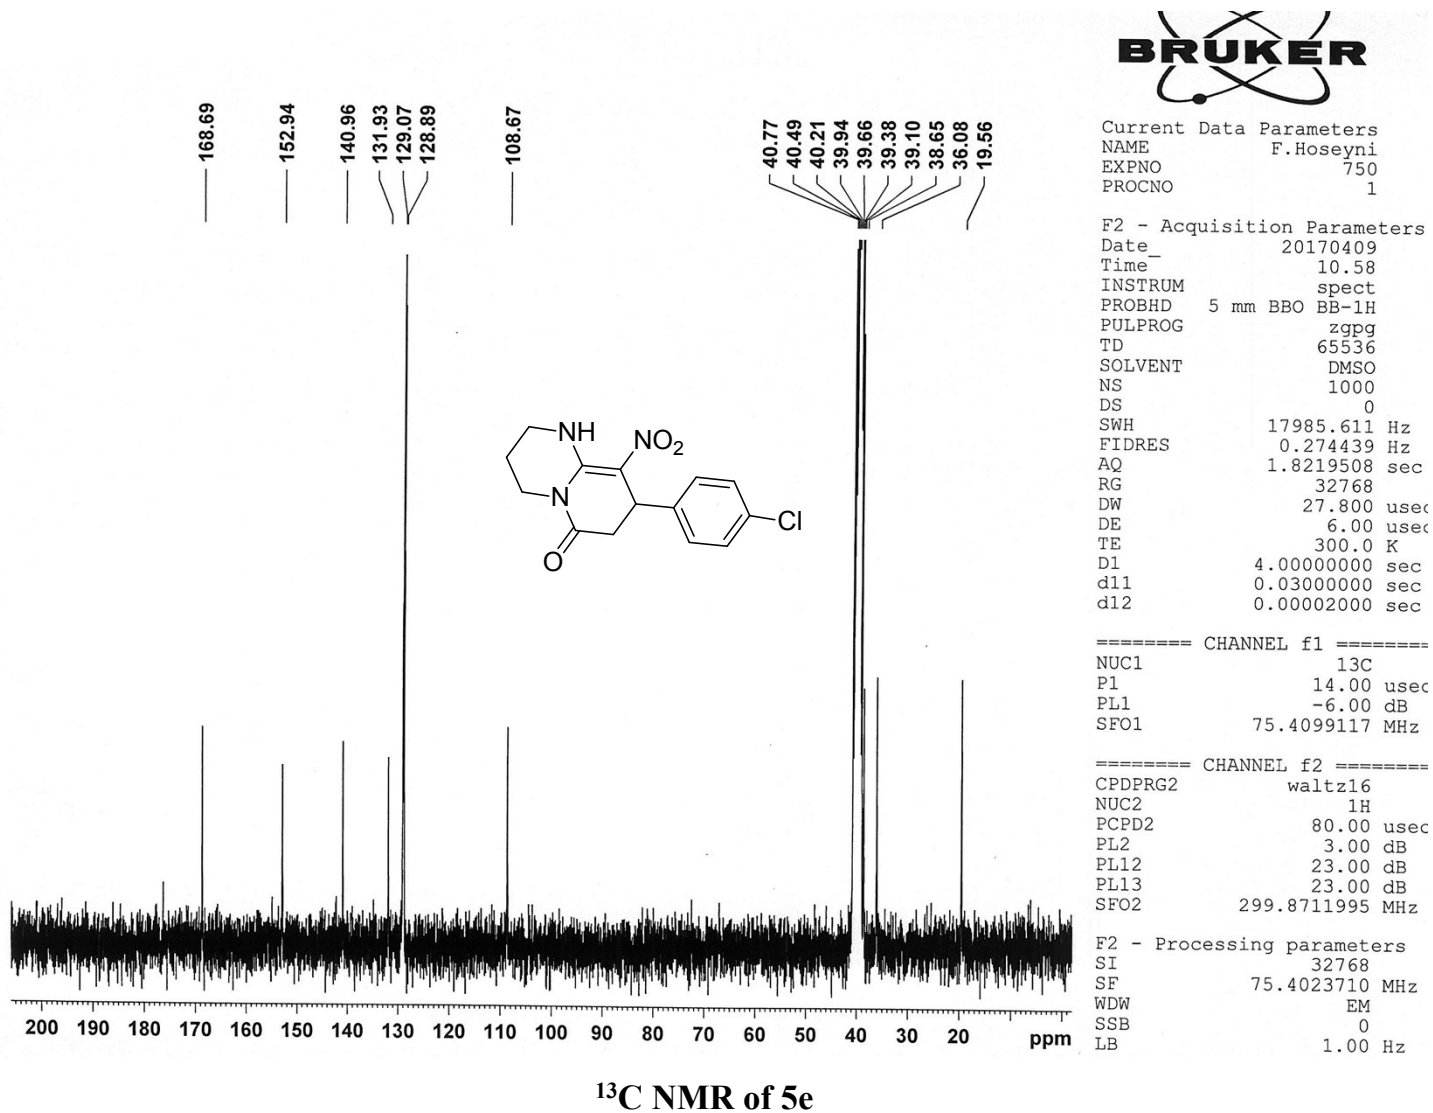

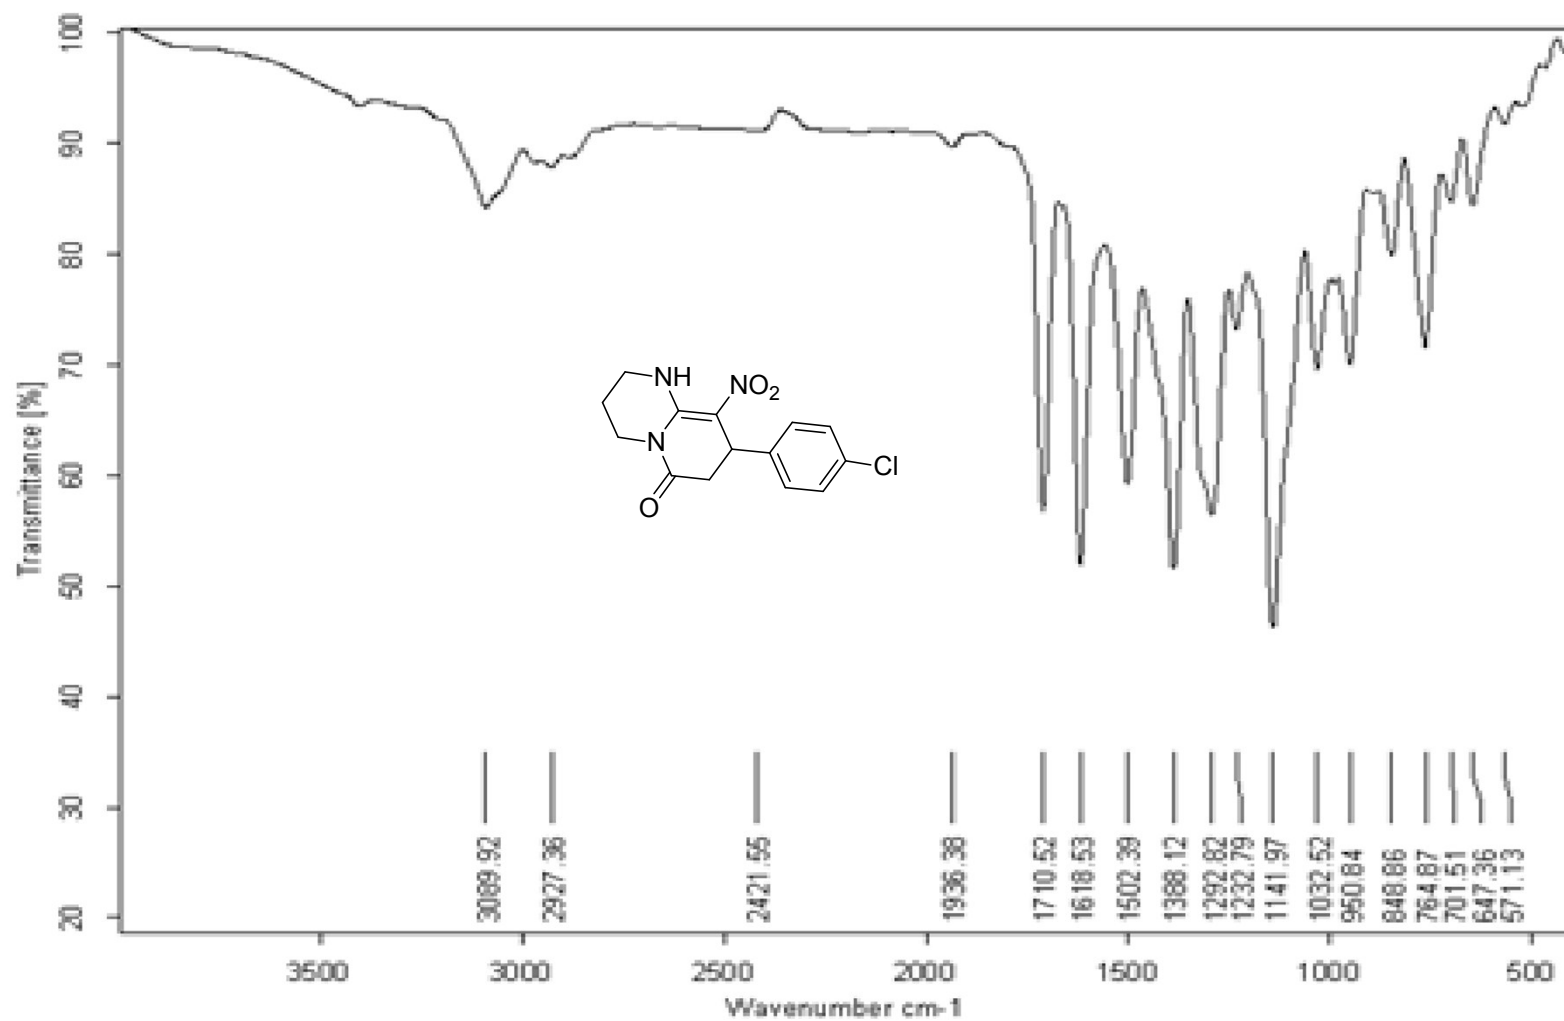

IR of 5e

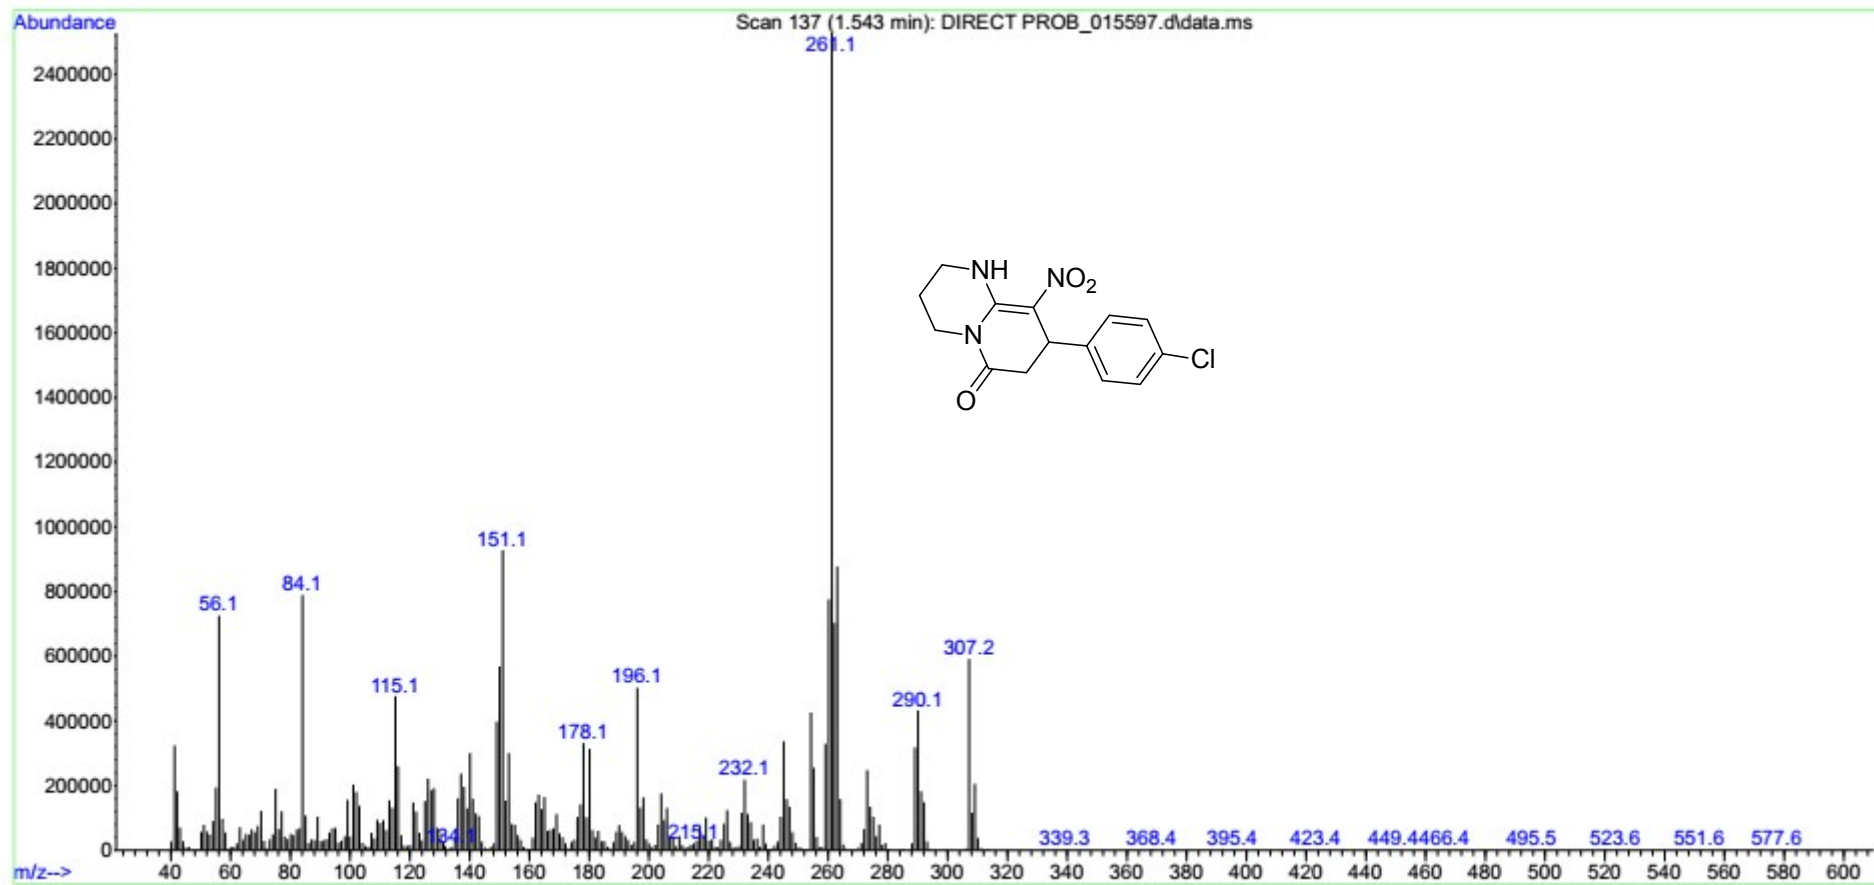

Mass of 5e



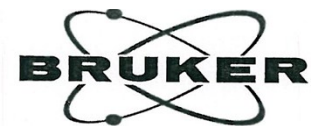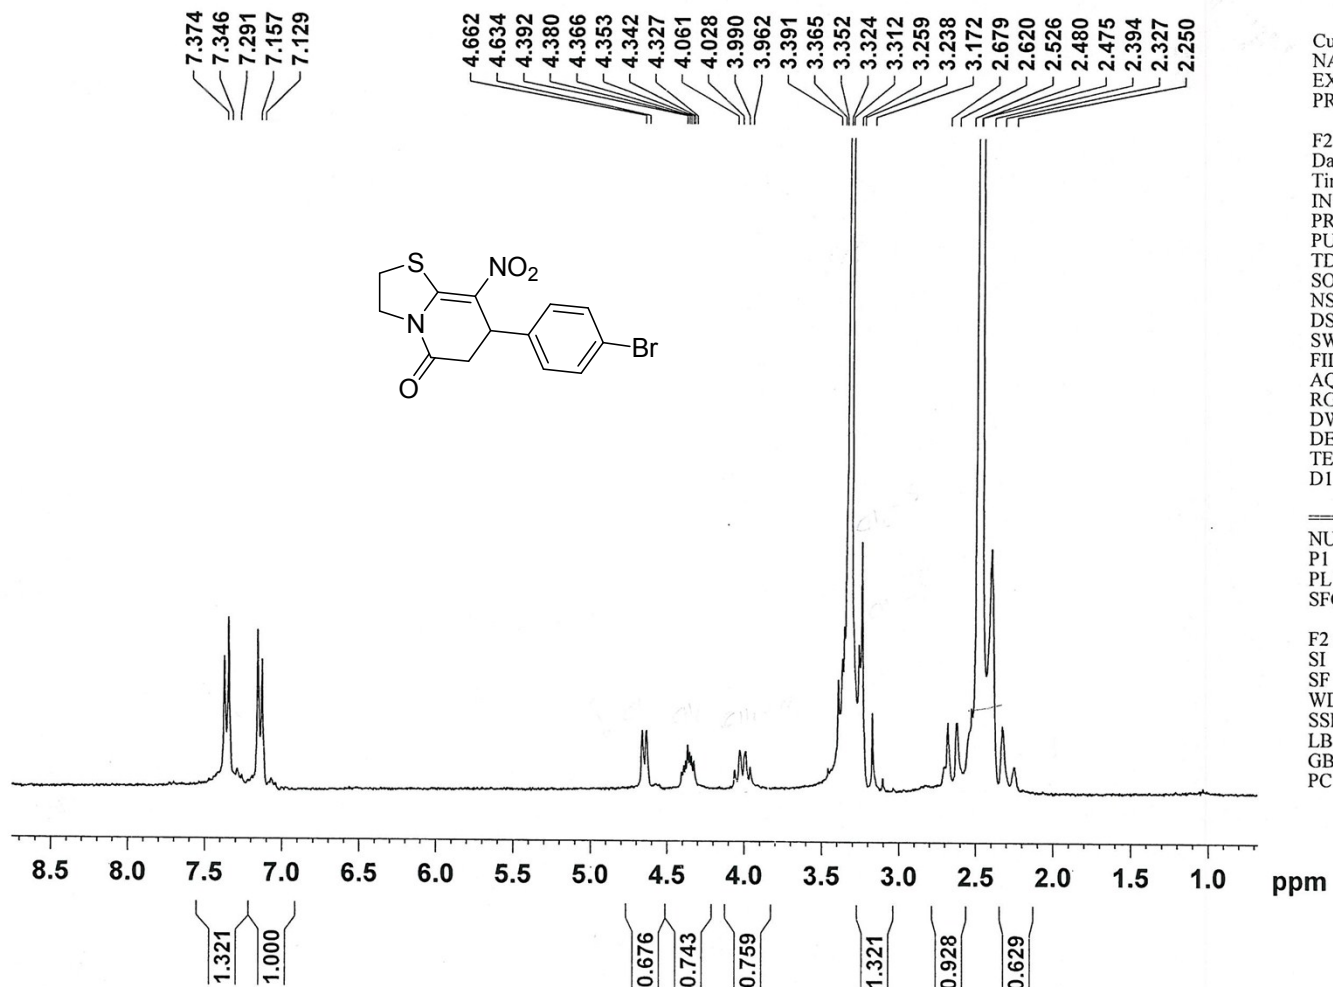

Current Data Parameters  
 NAME F.Hoseyni  
 EXPNO 702  
 PROCNO 1

F2 - Acquisition Parameters  
 Date\_ 20170107  
 Time 15.12  
 INSTRUM spect  
 PROBHD 5 mm BBO BB-1H  
 PULPROG zg  
 TD 16384  
 SOLVENT DMSO  
 NS 6  
 DS 0  
 SWH 5995.204 Hz  
 FIDRES 0.365918 Hz  
 AQ 1.3664756 sec  
 RG 322.5  
 DW 83.400 usec  
 DE 6.00 usec  
 TE 300.0 K  
 D1 6.00000000 sec

==== CHANNEL f1 ====  
 NUC1 1H  
 P1 9.00 usec  
 PL1 3.00 dB  
 SFO1 299.8729987 MHz

F2 - Processing parameters  
 SI 32768  
 SF 299.8700035 MHz  
 WDW EM  
 SSB 0  
 LB 0.30 Hz  
 GB 0  
 PC 1.00

<sup>1</sup>H NMR of 5f

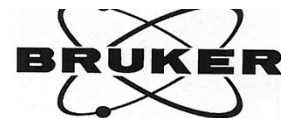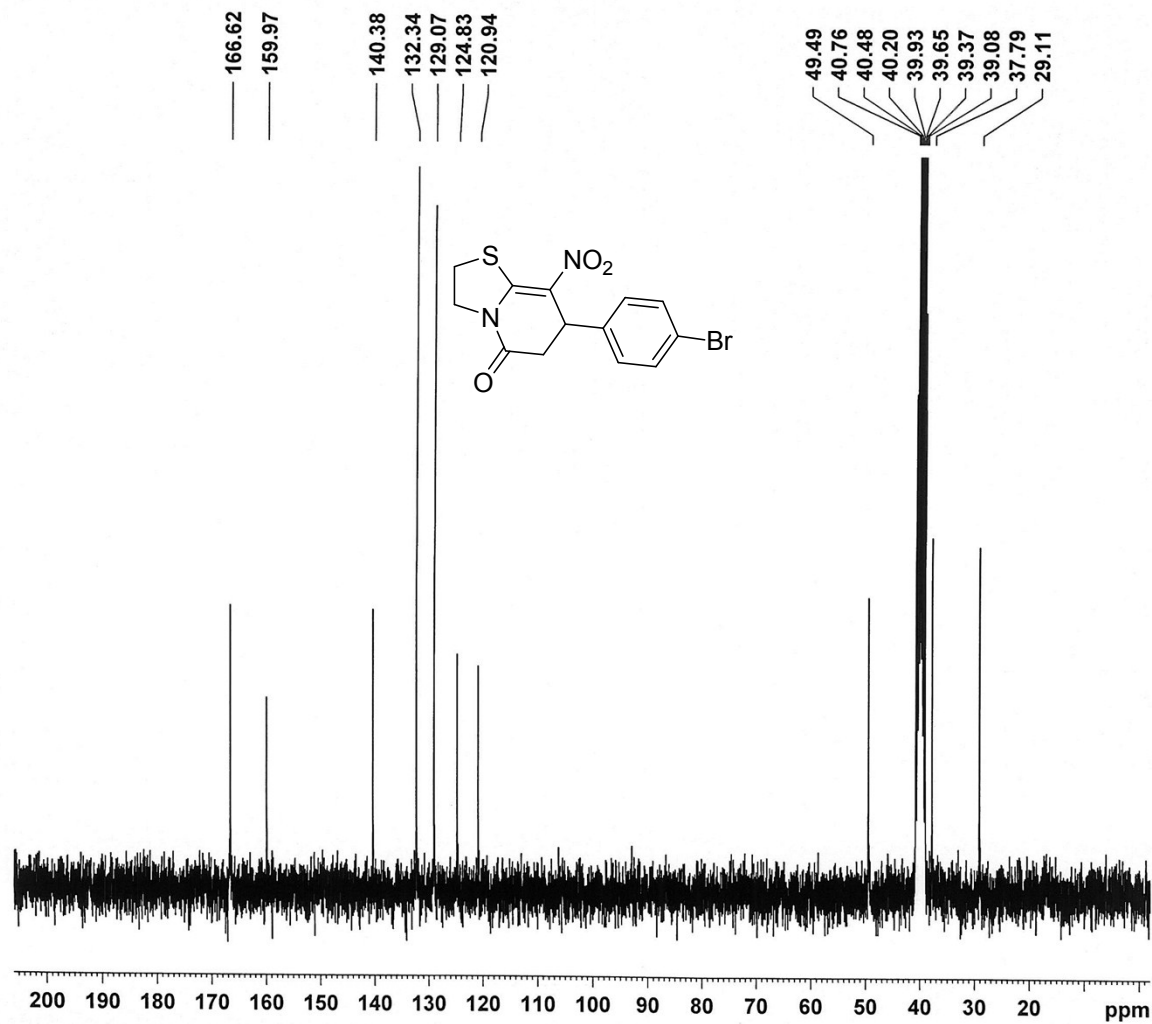<sup>13</sup>C NMR of 5f

Current Data Parameters  
 NAME F.Hoseyni  
 EXPNO 767  
 PROCNO 1

F2 - Acquisition Parameters  
 Date\_ 20170424  
 Time\_ 8.52  
 INSTRUM spect  
 PROBHD 5 mm BBO BB-1H  
 PULPROG zgpg  
 TD 65536  
 SOLVENT DMSO  
 NS 520  
 DS 0  
 SWH 17985.611 Hz  
 FIDRES 0.274439 Hz  
 AQ 1.8219508 sec  
 RG 32768  
 DW 27.800 usec  
 DE 6.00 usec  
 TE 300.0 K  
 D1 4.00000000 sec  
 d11 0.03000000 sec  
 d12 0.00002000 sec

==== CHANNEL f1 =====  
 NUC1 13C  
 P1 14.00 usec  
 PL1 -6.00 dB  
 SFO1 75.4099117 MHz

==== CHANNEL f2 =====  
 CPDPRG2 waltz16  
 NUC2 1H  
 PCPD2 80.00 usec  
 PL2 3.00 dB  
 PL12 23.00 dB  
 PL13 23.00 dB  
 SFO2 299.8711995 MHz

F2 - Processing parameters  
 SI 32768  
 SF 75.4023710 MHz  
 WDW EM  
 SSB 0  
 LB 1.00 Hz  
 GB 0

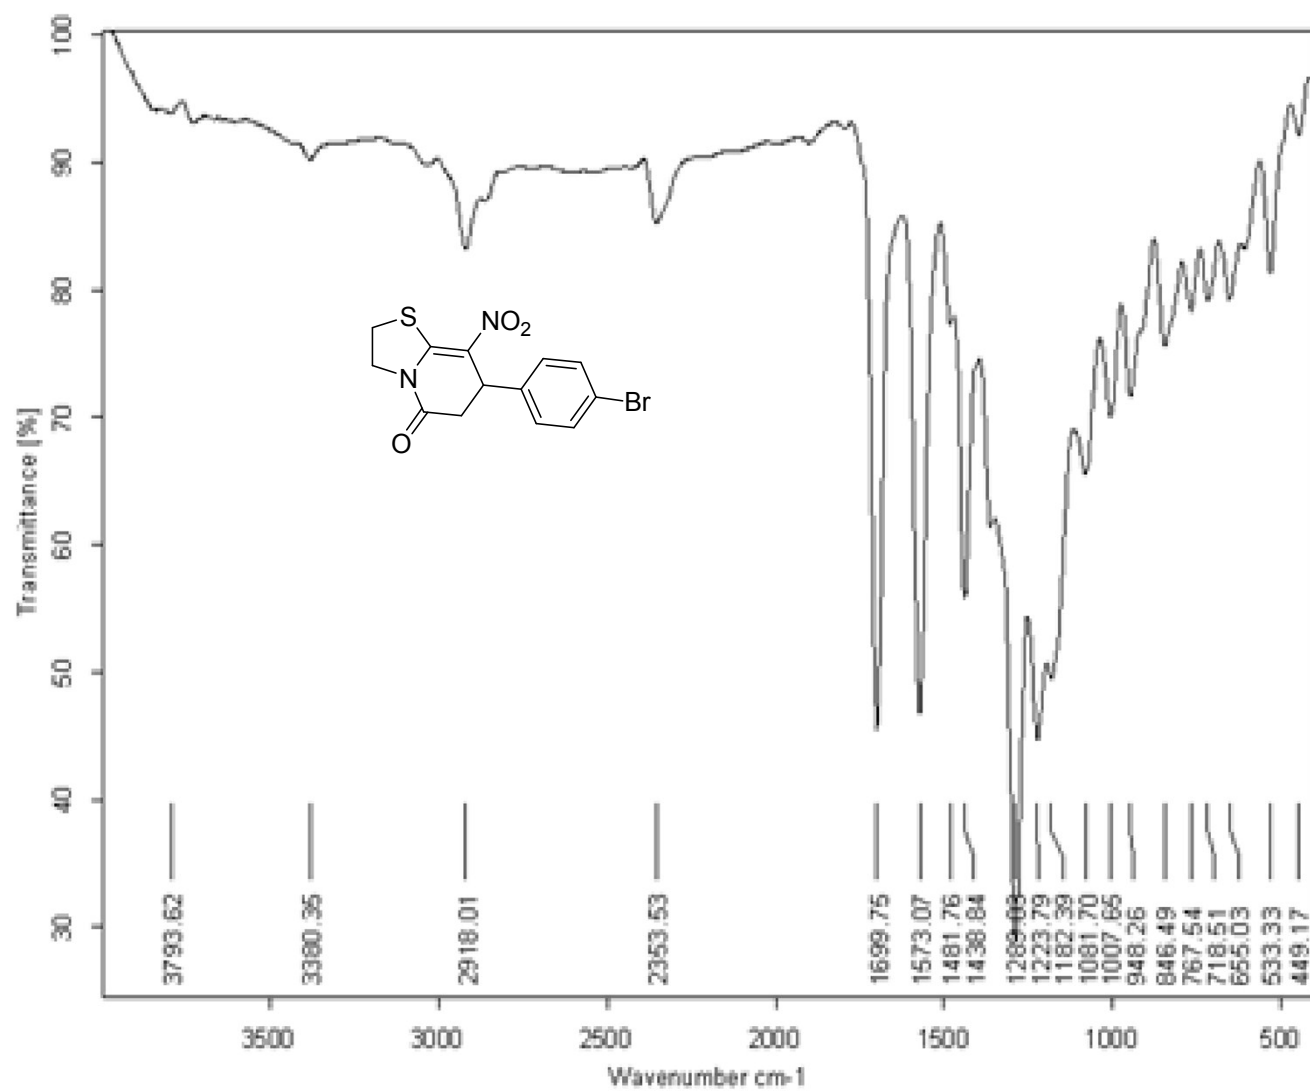

IR of 5f

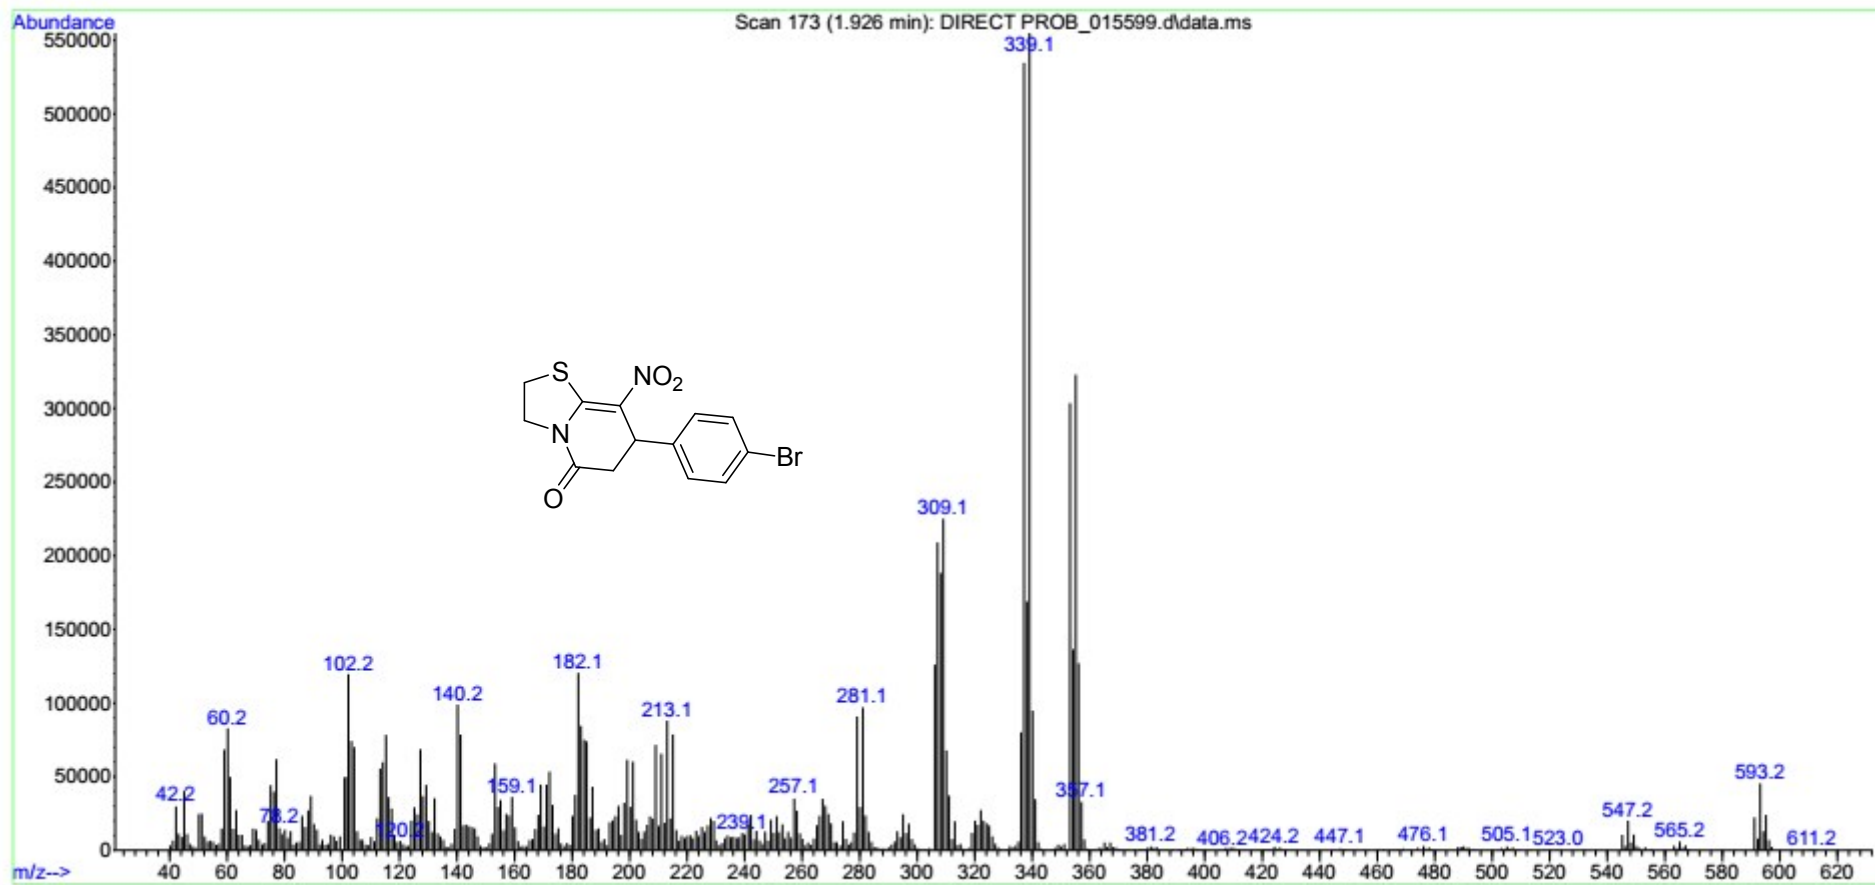

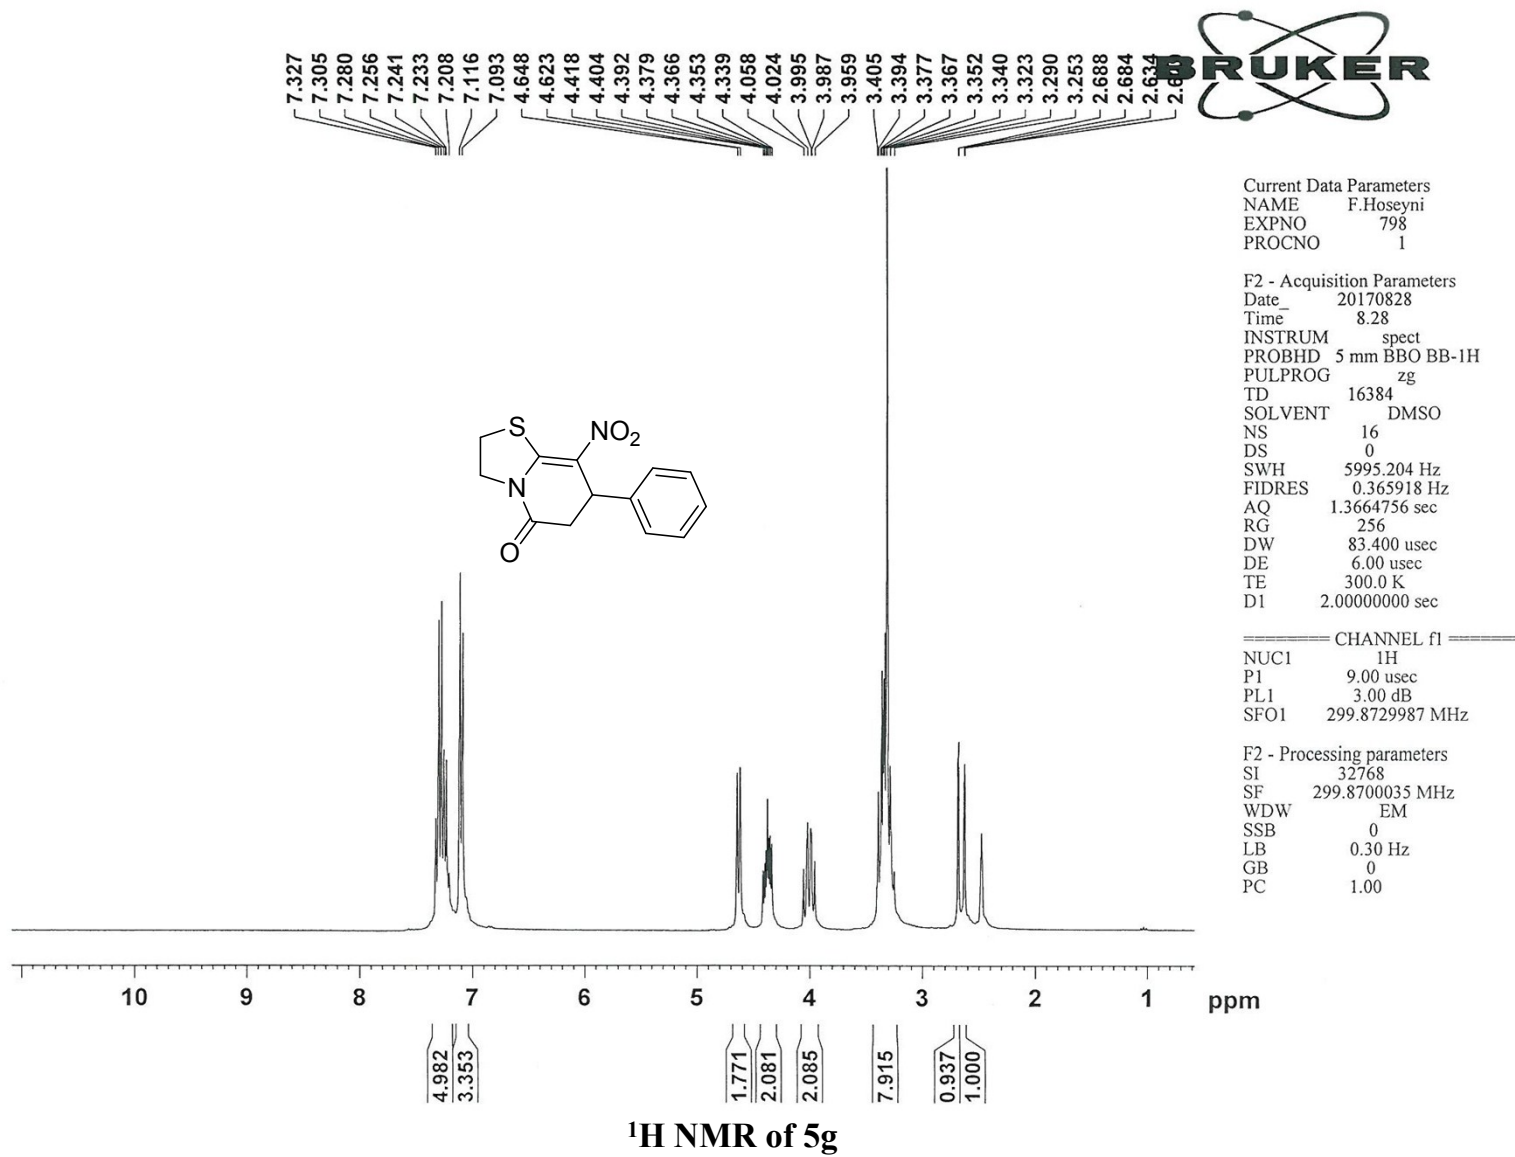

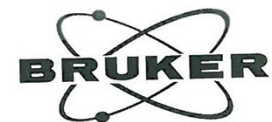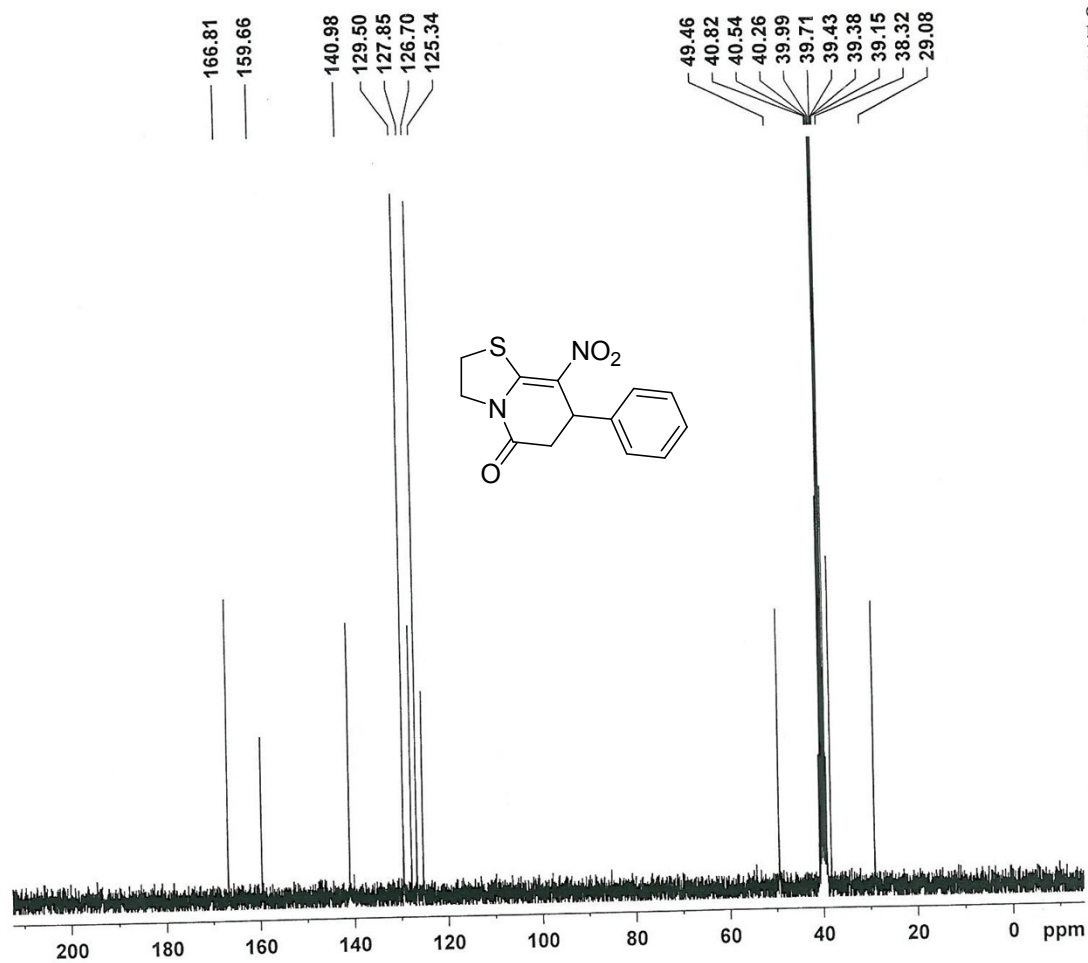 $^{13}\text{C}$  NMR of 5g

Current Data Parameters  
 NAME F.Hoseyni  
 EXPNO 805  
 PROCNO 1

F2 - Acquisition Parameters  
 Date\_ 20170831  
 Time\_ 10.04  
 INSTRUM spect  
 PROBHD 5 mm BBO BB-1H  
 PULPROG zgpg  
 TD 65536  
 SOLVENT DMSO  
 NS 850  
 DS 0  
 SWH 17985.611 Hz  
 FIDRES 0.274439 Hz  
 AQ 1.8219508 sec  
 RG 32768  
 DW 27.800 usec  
 DE 6.00 usec  
 TE 300.0 K  
 D1 2.00000000 sec  
 d11 0.03000000 sec  
 d12 0.00002000 sec

===== CHANNEL f1 =====  
 NUC1 13C  
 P1 14.00 usec  
 PL1 -6.00 dB  
 SFO1 75.4099117 MHz

===== CHANNEL f2 =====  
 CPDPRG2 waltz16  
 NUC2 1H  
 PCPD2 80.00 usec  
 PL2 3.00 dB  
 PL12 23.00 dB  
 PL13 23.00 dB  
 SFO2 299.8711995 MHz

F2 - Processing parameters  
 SI 32768  
 SF 75.4023710 MHz  
 WDW EM  
 SSB 0  
 LB 1.00 Hz  
 GB 0  
 PC 1.40

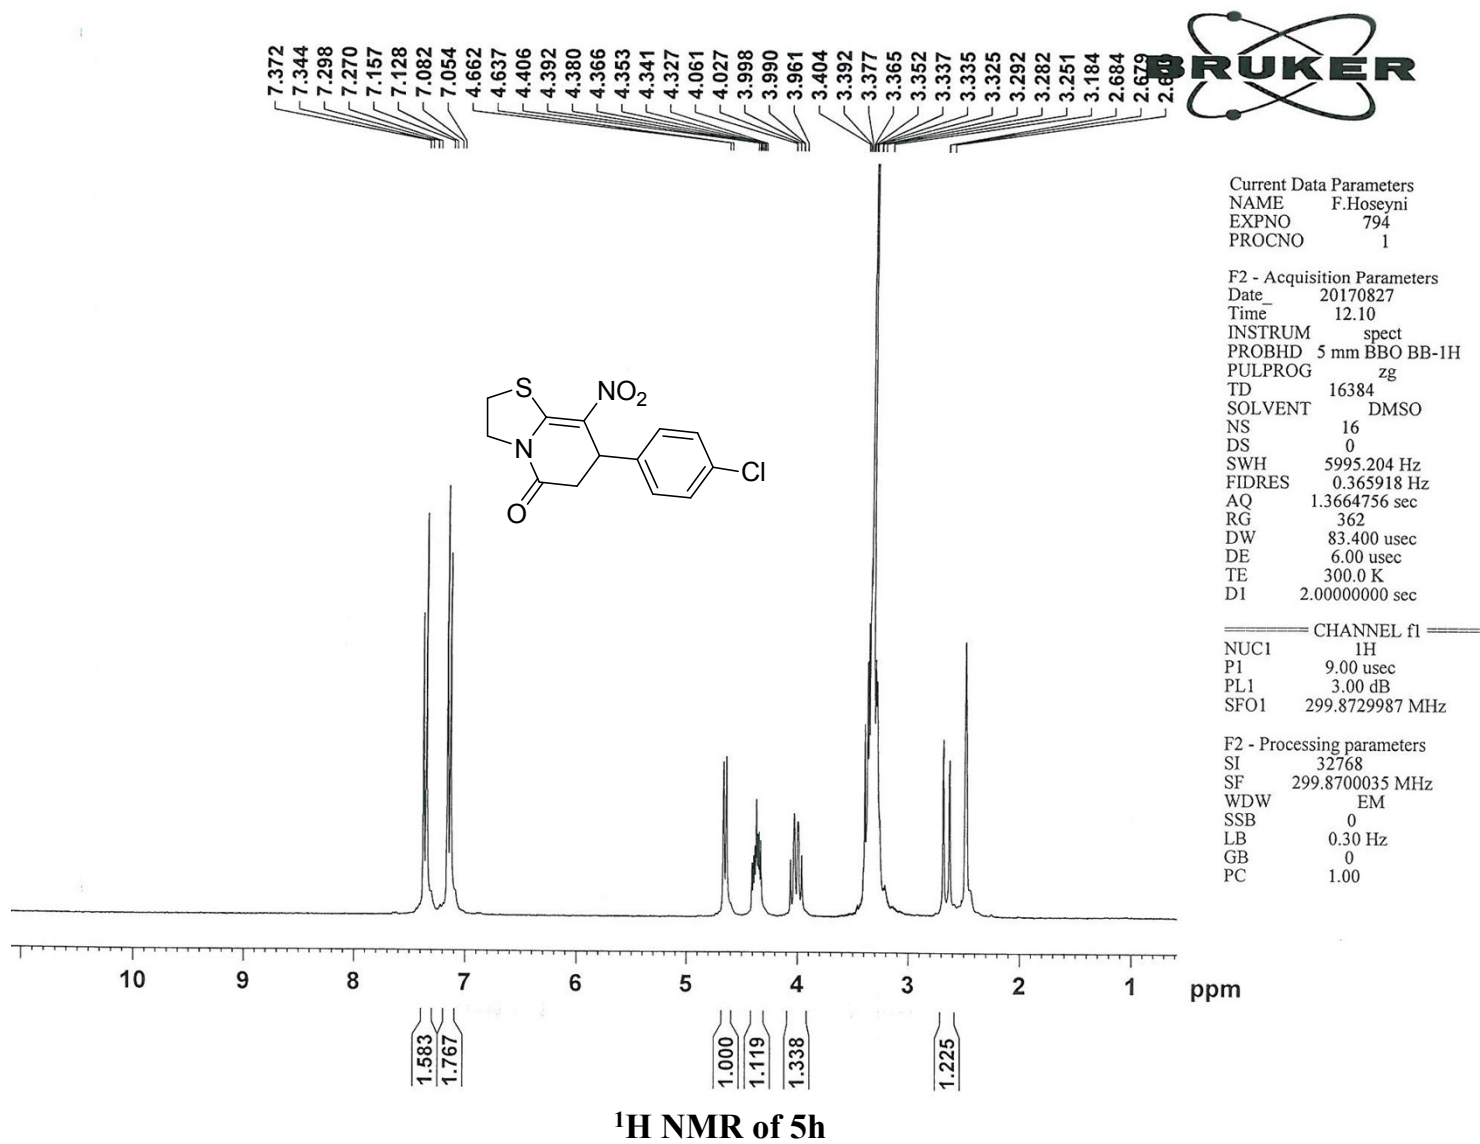

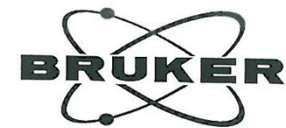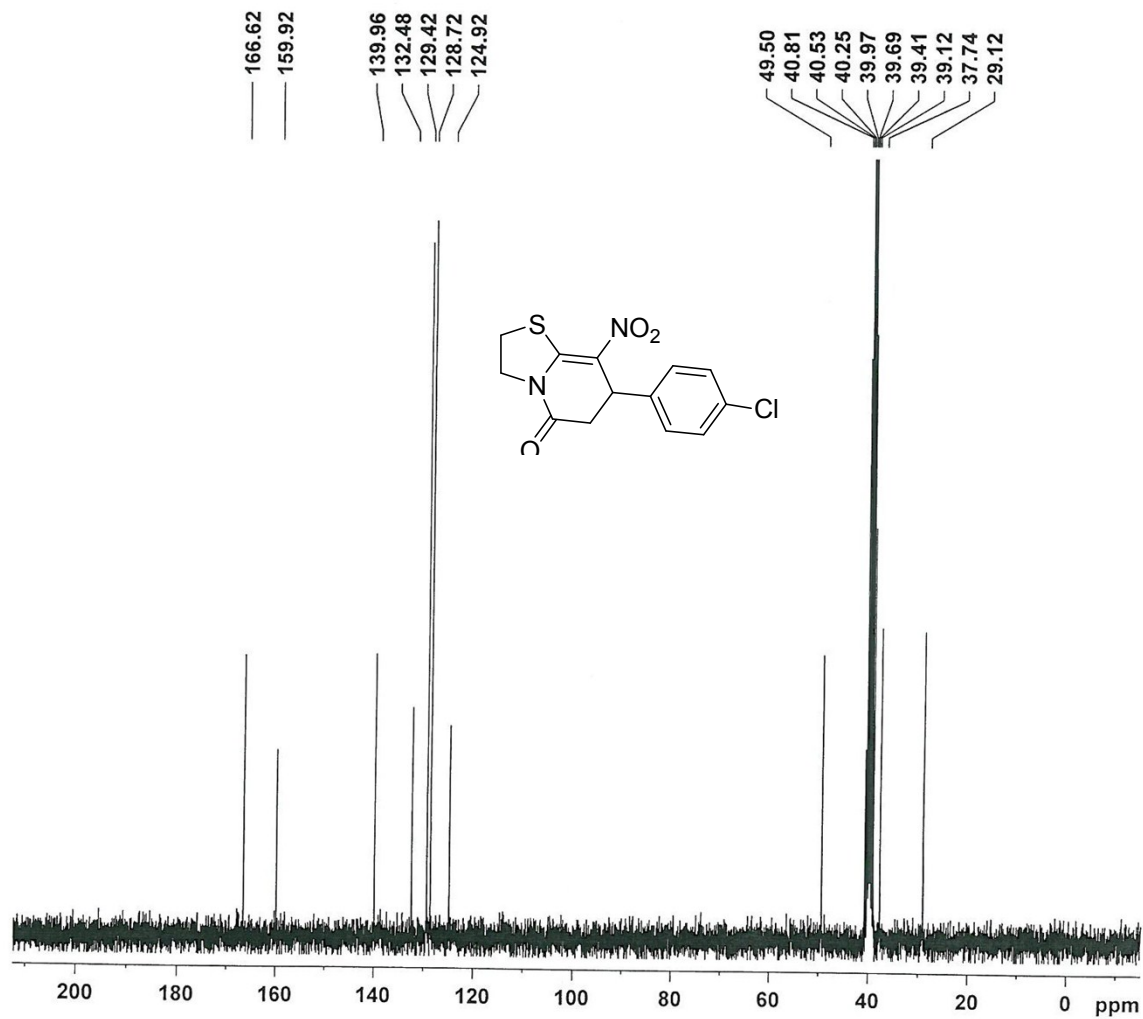

Current Data Parameters  
 NAME F.Hoseyni  
 EXPNO 802  
 PROCNO 1

F2 - Acquisition Parameters  
 Date\_ 20170828  
 Time\_ 10.05  
 INSTRUM spect  
 PROBHD 5 mm BBO BB-1H  
 PULPROG zgpg  
 TD 65536  
 SOLVENT DMSO  
 NS 1200  
 DS 0  
 SWH 17985.611 Hz  
 FIDRES 0.274439 Hz  
 AQ 1.8219508 sec  
 RG 32768  
 DW 27.800 usec  
 DE 6.00 usec  
 TE 300.0 K  
 D1 2.00000000 sec  
 d11 0.03000000 sec  
 d12 0.00002000 sec

==== CHANNEL f1 =====  
 NUC1 13C  
 P1 14.00 usec  
 PL1 -6.00 dB  
 SFO1 75.4099117 MHz

==== CHANNEL f2 =====  
 CPDPRG2 waltz16  
 NUC2 1H  
 PCPD2 80.00 usec  
 PL2 3.00 dB  
 PL12 23.00 dB  
 PL13 23.00 dB  
 SFO2 299.8711995 MHz

F2 - Processing parameters  
 SI 32768  
 SF 75.4023710 MHz  
 WDW EM  
 SSB 0  
 LB 1.00 Hz  
 GB 0



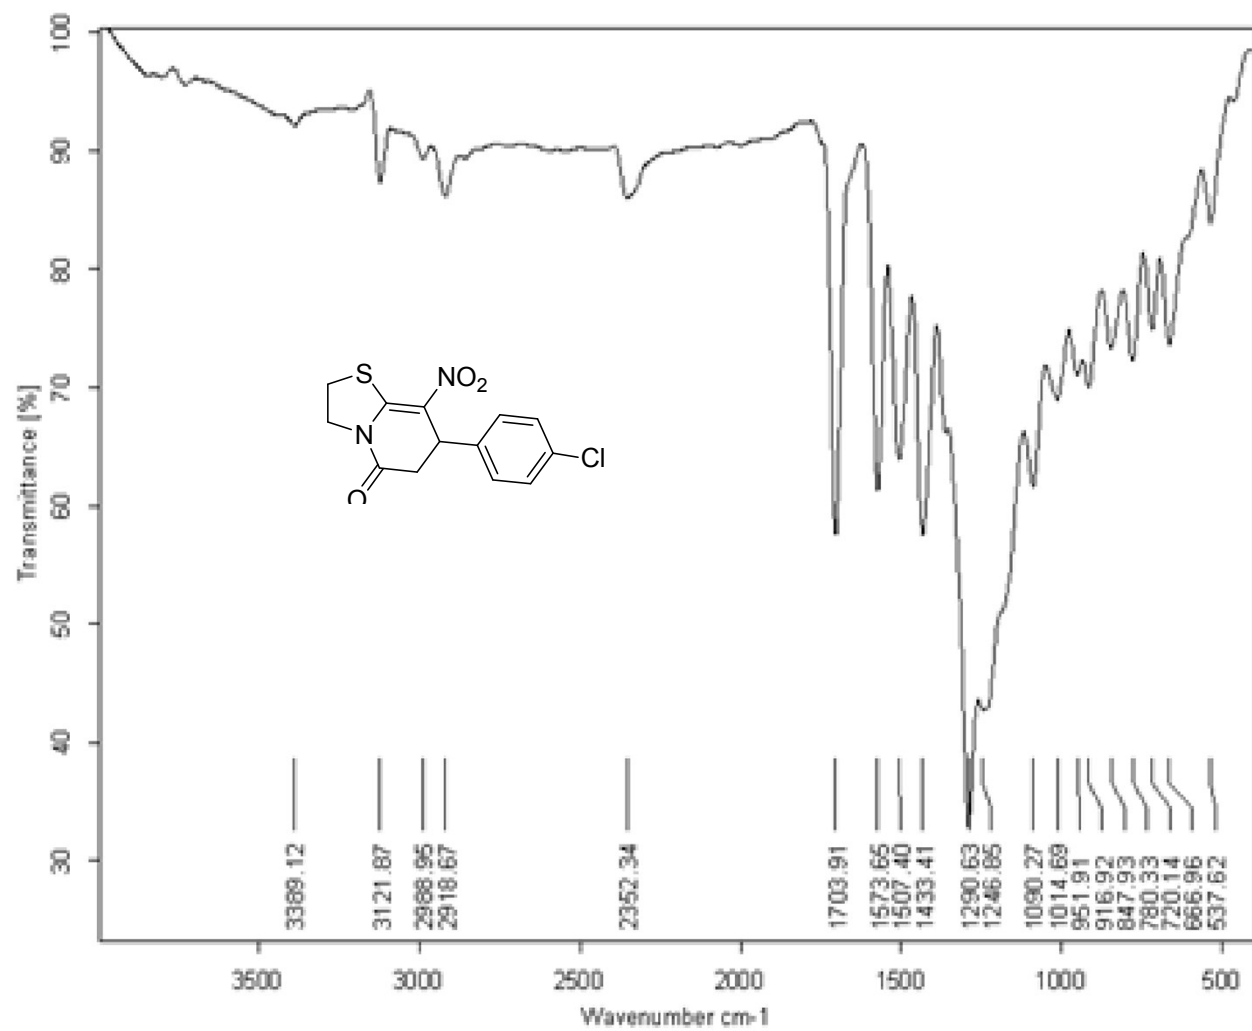

IR of 5h

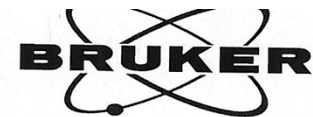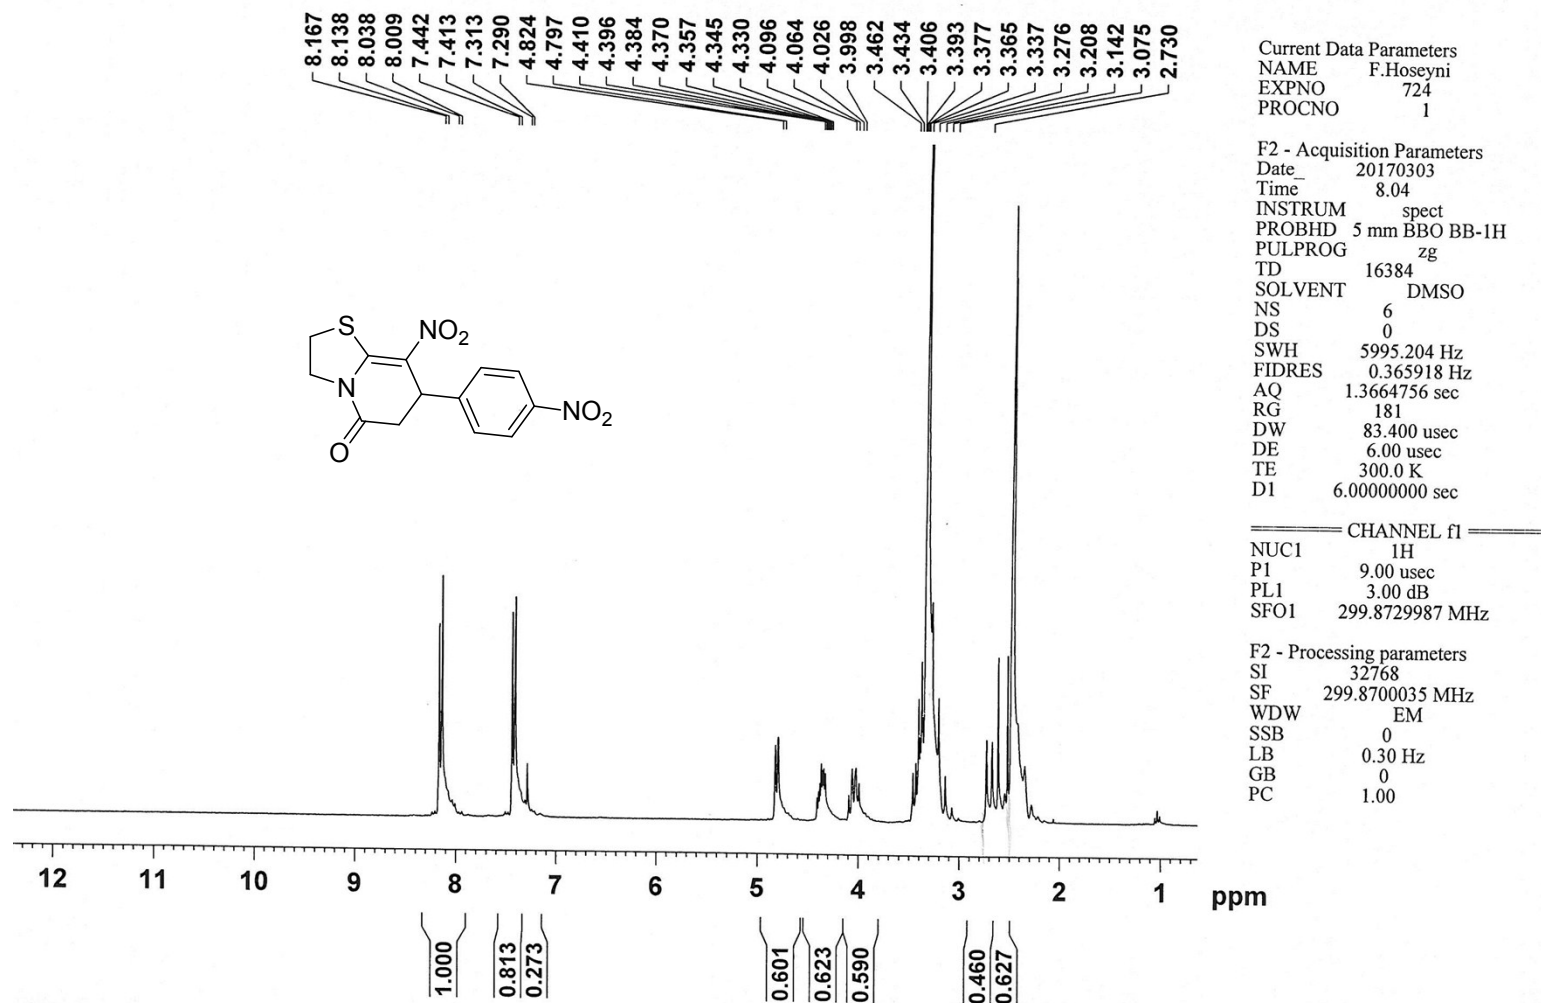<sup>1</sup>H NMR of 5i

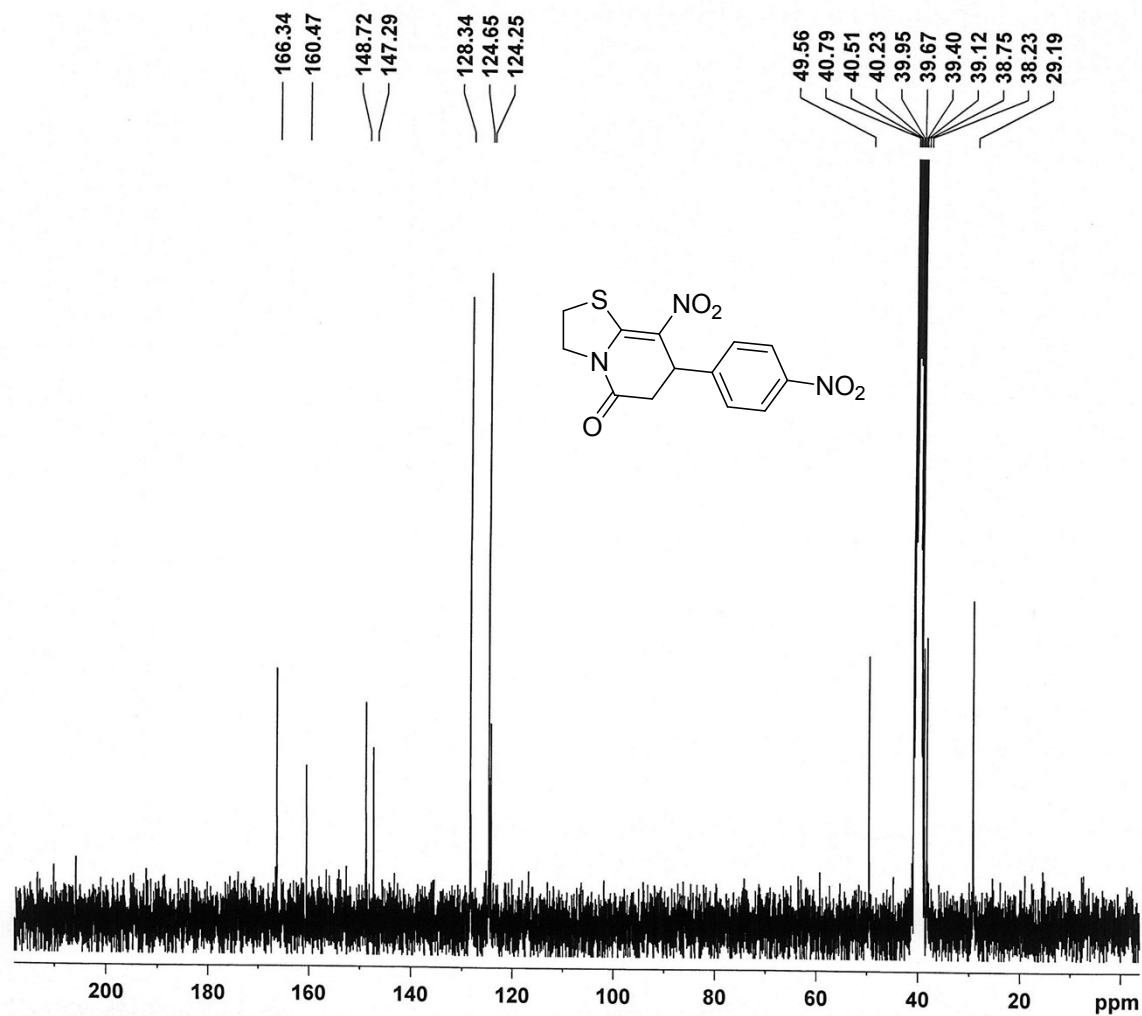

**BRUKER**

Current Data Parameters  
NAME F.Hoseyni  
EXPNO 729  
PROCNO 1

F2 - Acquisition Parameters  
Date\_ 20170305  
Time\_ 11.36  
INSTRUM spect  
PROBHD 5 mm BBO BB-1H  
PULPROG zgpg  
TD 65536  
SOLVENT DMSO  
NS 1000  
DS 0  
SWH 17985.611 Hz  
FIDRES 0.274439 Hz  
AQ 1.8219508 sec  
RG 32768  
DW 27.800 usec  
DE 6.00 usec  
TE 300.0 K  
D1 4.00000000 sec  
d11 0.03000000 sec  
d12 0.00002000 sec

===== CHANNEL f1 =====  
NUC1 13C  
P1 14.00 usec  
PL1 -6.00 dB  
SFO1 75.4099117 MHz

===== CHANNEL f2 =====  
CPDPRG2 waltz16  
NUC2 1H  
PCPD2 80.00 usec  
PL2 3.00 dB  
PL12 23.00 dB  
PL13 23.00 dB  
SFO2 299.8711995 MHz

F2 - Processing parameters  
SI 32768  
SF 75.4023710 MHz  
WDW EM  
SSB 0  
LB 1.00 Hz  
GB ^

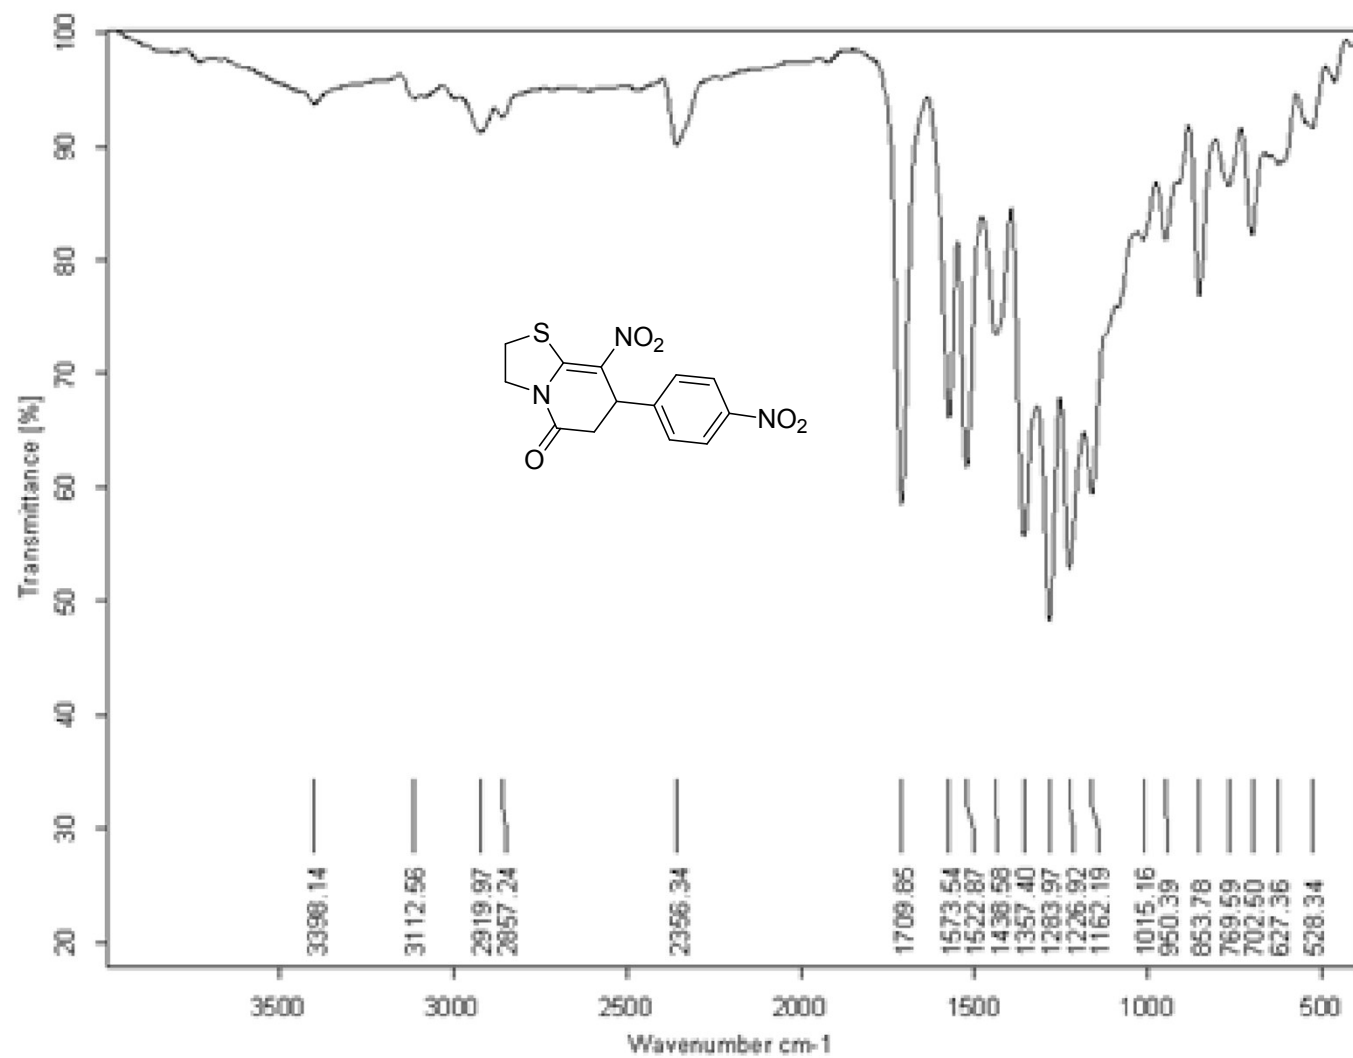

IR of 5i

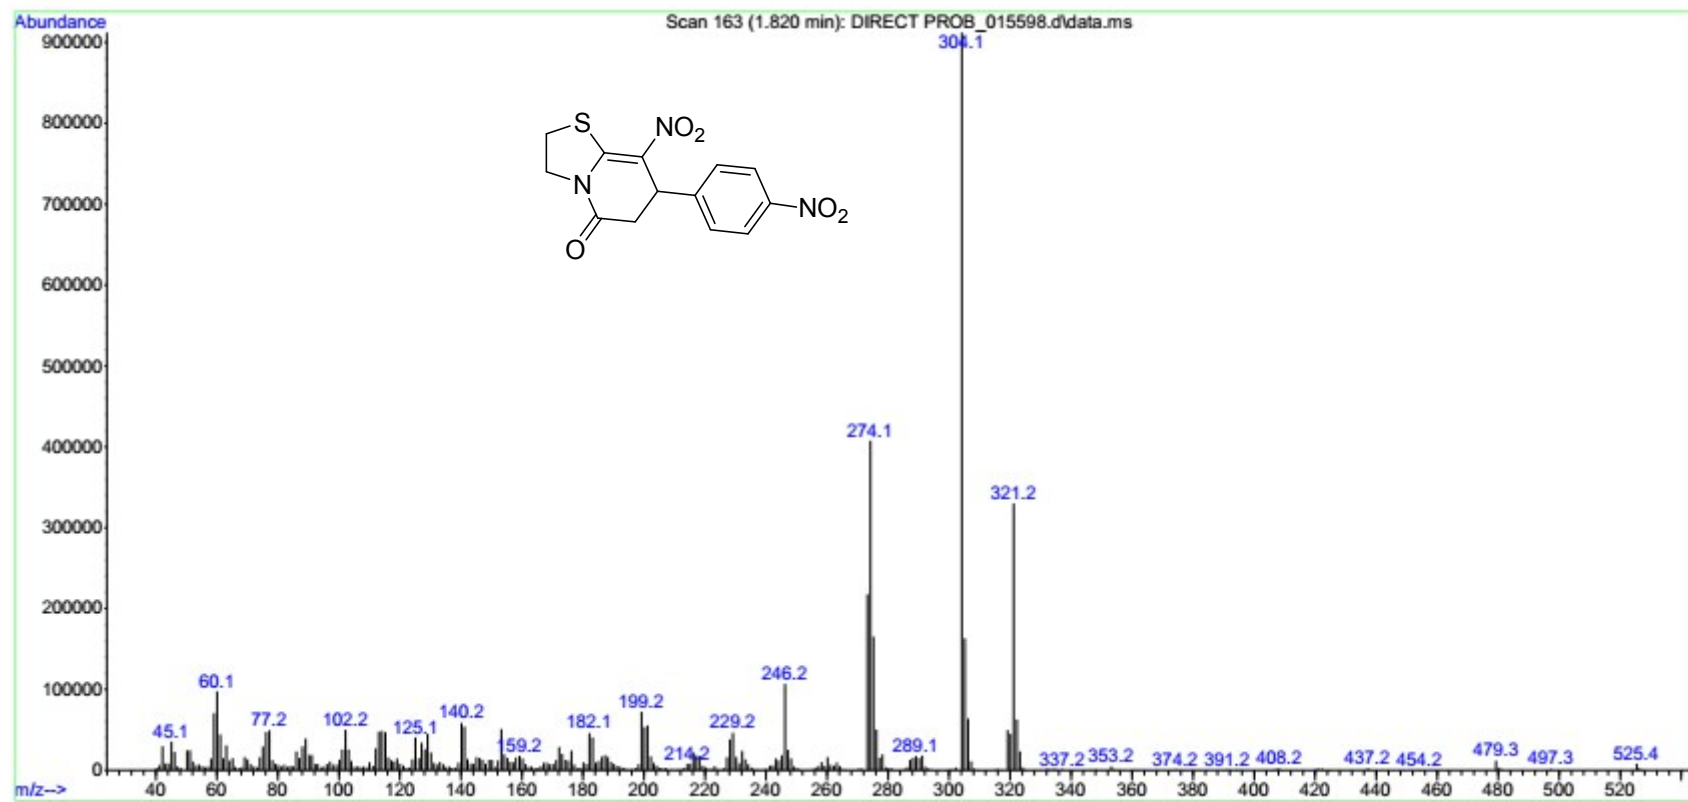

Mass of 5i

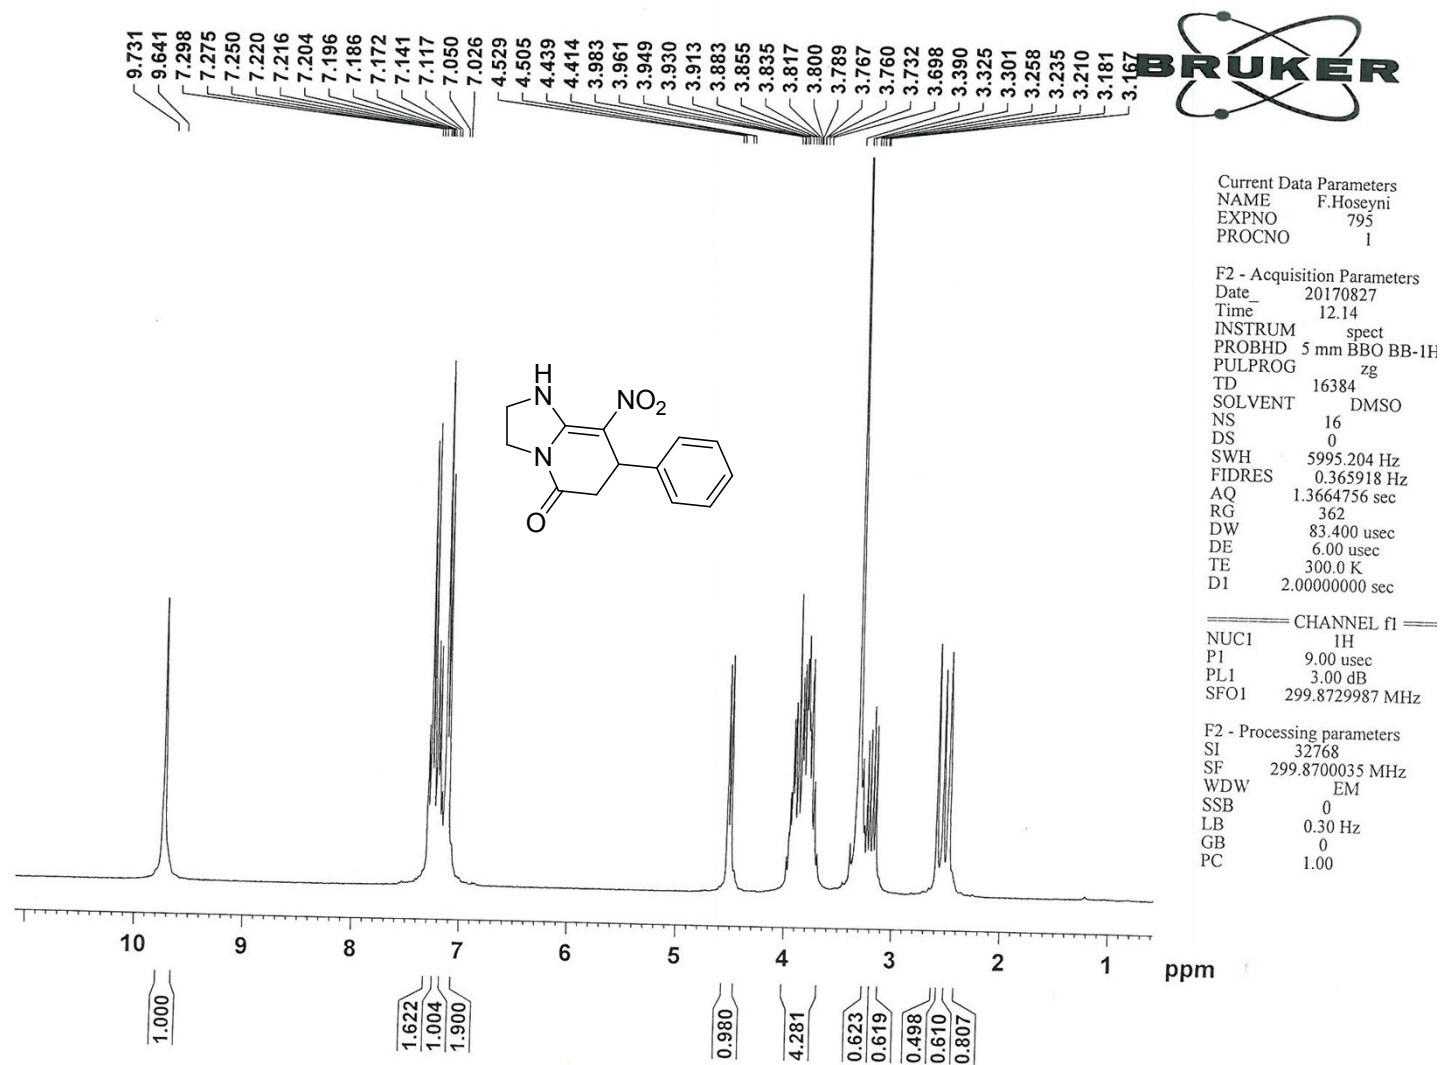<sup>1</sup>H NMR of 5j

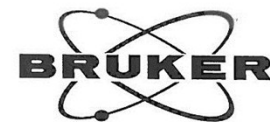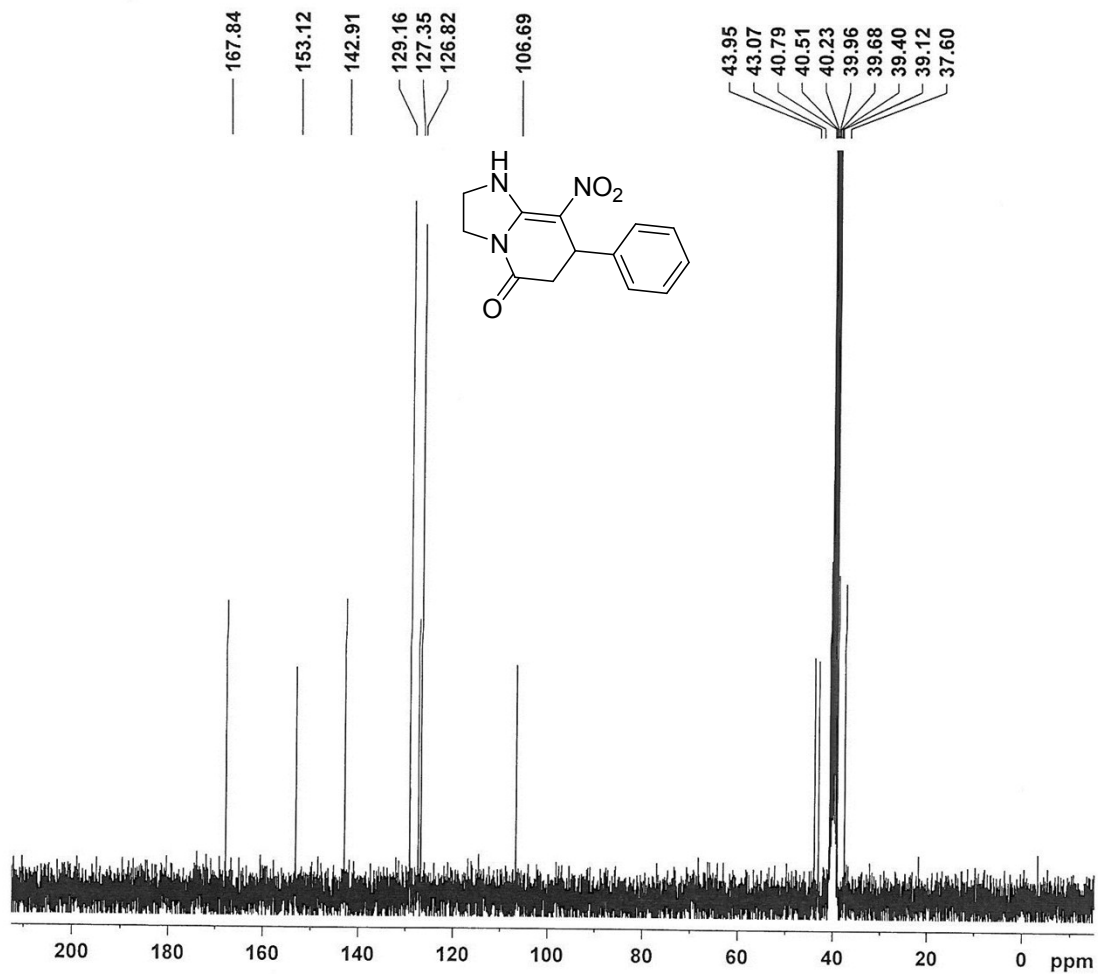<sup>13</sup>C NMR of 5j

Current Data Parameters  
 NAME F.Hoseyni  
 EXPNO 803  
 PROCNO 1

F2 - Acquisition Parameters  
 Date\_ 20170828  
 Time\_ 11.38  
 INSTRUM spect  
 PROBHD 5 mm BBO BB-1H  
 PULPROG zgpg  
 TD 65536  
 SOLVENT DMSO  
 NS 1400  
 DS 0  
 SWH 17985.611 Hz  
 FIDRES 0.274439 Hz  
 AQ 1.8219508 sec  
 RG 32768  
 DW 27.800 usec  
 DE 6.00 usec  
 TE 300.0 K  
 D1 2.00000000 sec  
 d11 0.03000000 sec  
 d12 0.00002000 sec

===== CHANNEL f1 =====  
 NUC1 13C  
 P1 14.00 usec  
 PL1 -6.00 dB  
 SFO1 75.4099117 MHz

===== CHANNEL f2 =====  
 CPDPRG2 waltz16  
 NUC2 1H  
 PCPD2 80.00 usec  
 PL2 3.00 dB  
 PL12 23.00 dB  
 PL13 23.00 dB  
 SFO2 299.8711995 MHz

F2 - Processing parameters  
 SI 32768  
 SF 75.4023710 MHz  
 WDW EM  
 SSB 0  
 LB 1.00 Hz  
 GB 0

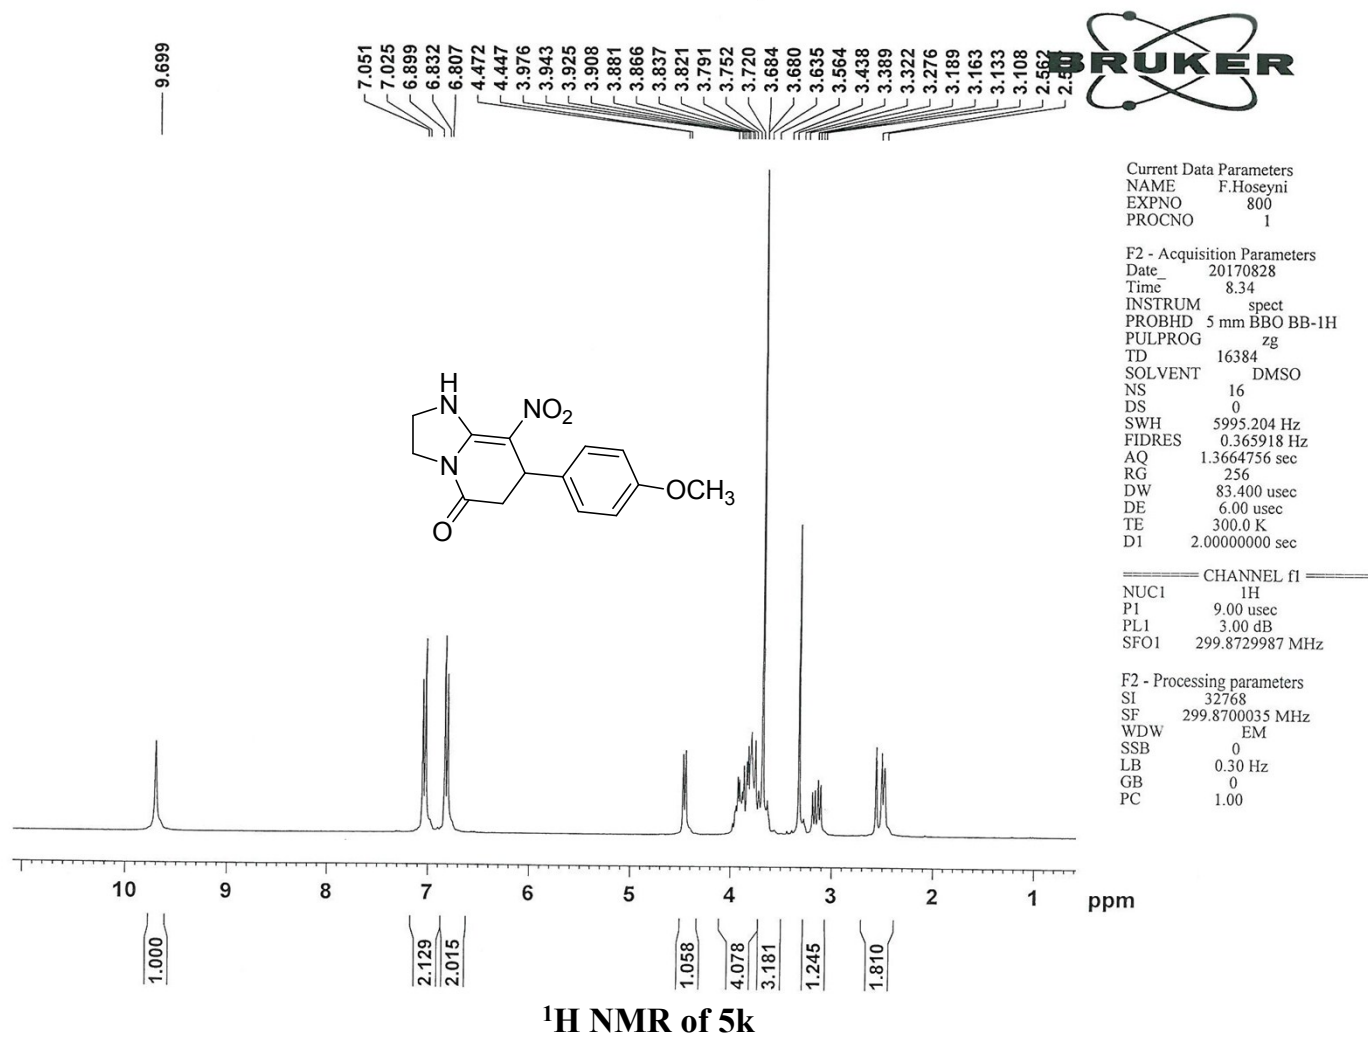



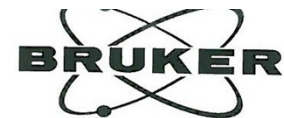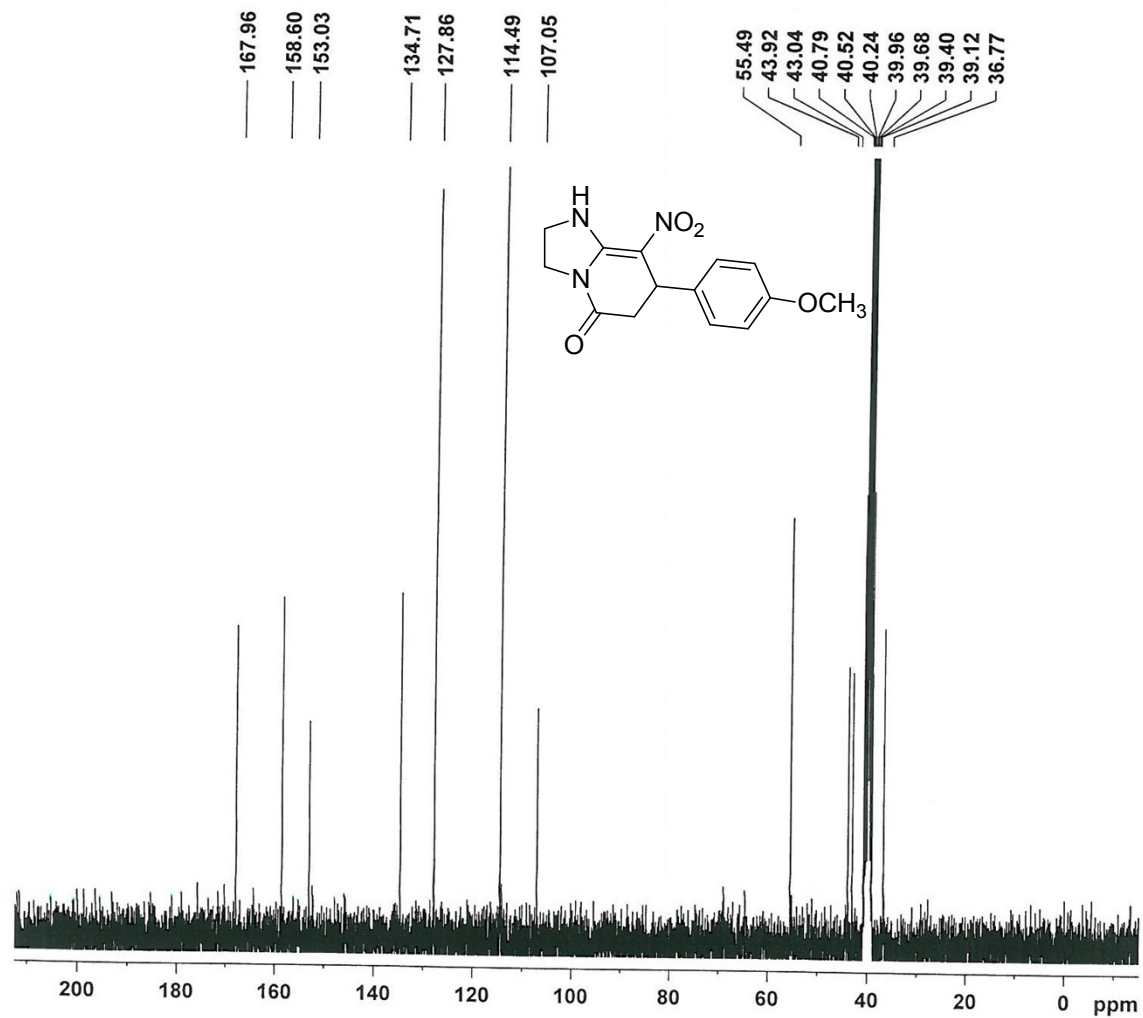

Current Data Parameters  
 NAME F.Hoseyni  
 EXPNO 807  
 PROCNO 1

F2 - Acquisition Parameters  
 Date\_ 20170831  
 Time\_ 13.15  
 INSTRUM spect  
 PROBHD 5 mm BBO BB-1H  
 PULPROG zgpg  
 TD 65536  
 SOLVENT DMSO  
 NS 2000  
 DS 0  
 SWH 17985.611 Hz  
 FIDRES 0.274439 Hz  
 AQ 1.8219508 sec  
 RG 32768  
 DW 27.800 usec  
 DE 6.00 usec  
 TE 300.0 K  
 D1 2.0000000 sec  
 d11 0.0300000 sec  
 d12 0.0000200 sec

==== CHANNEL f1 =====  
 NUC1 13C  
 P1 14.00 usec  
 PL1 -6.00 dB  
 SFO1 75.4099117 MHz

==== CHANNEL f2 =====  
 CPDPRG2 waltz16  
 NUC2 1H  
 PCPD2 80.00 usec  
 PL2 3.00 dB  
 PL12 23.00 dB  
 PL13 23.00 dB  
 SFO2 299.8711995 MHz

F2 - Processing parameters  
 SI 32768  
 SF 75.4023710 MHz  
 WDW EM  
 SSB 0  
 LB 1.00 Hz  
 GR ^

<sup>13</sup>C NMR of 5k

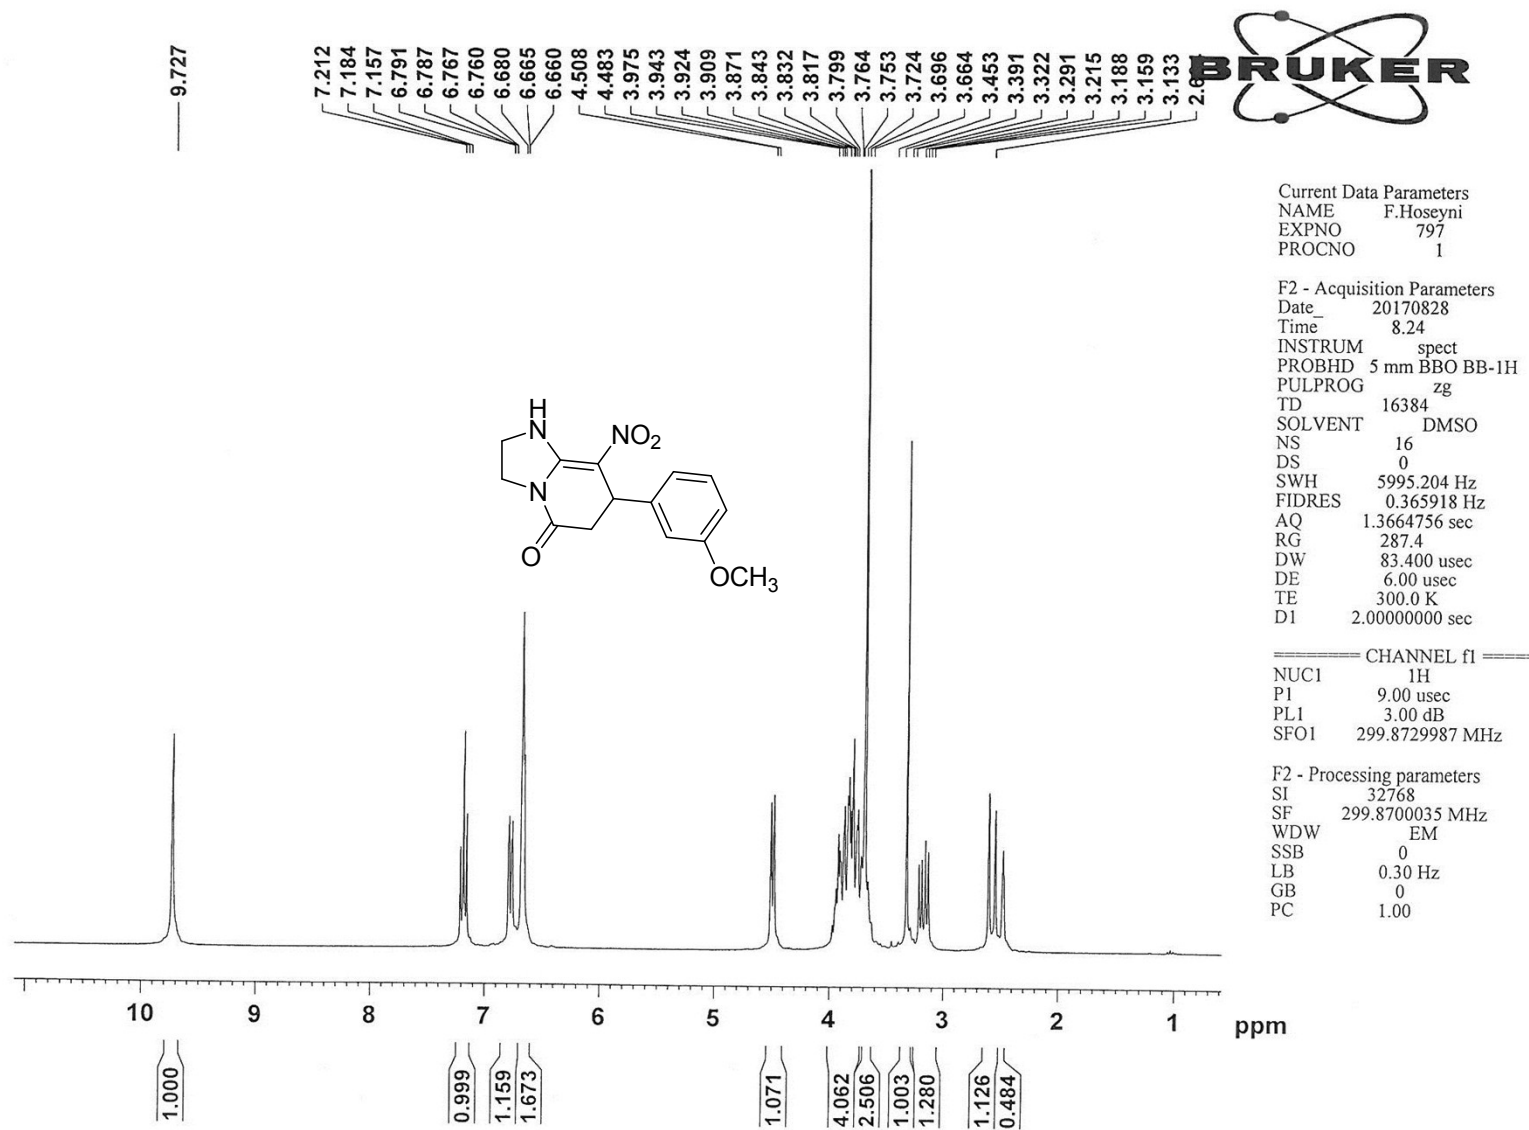<sup>1</sup>H NMR of 5I

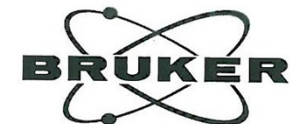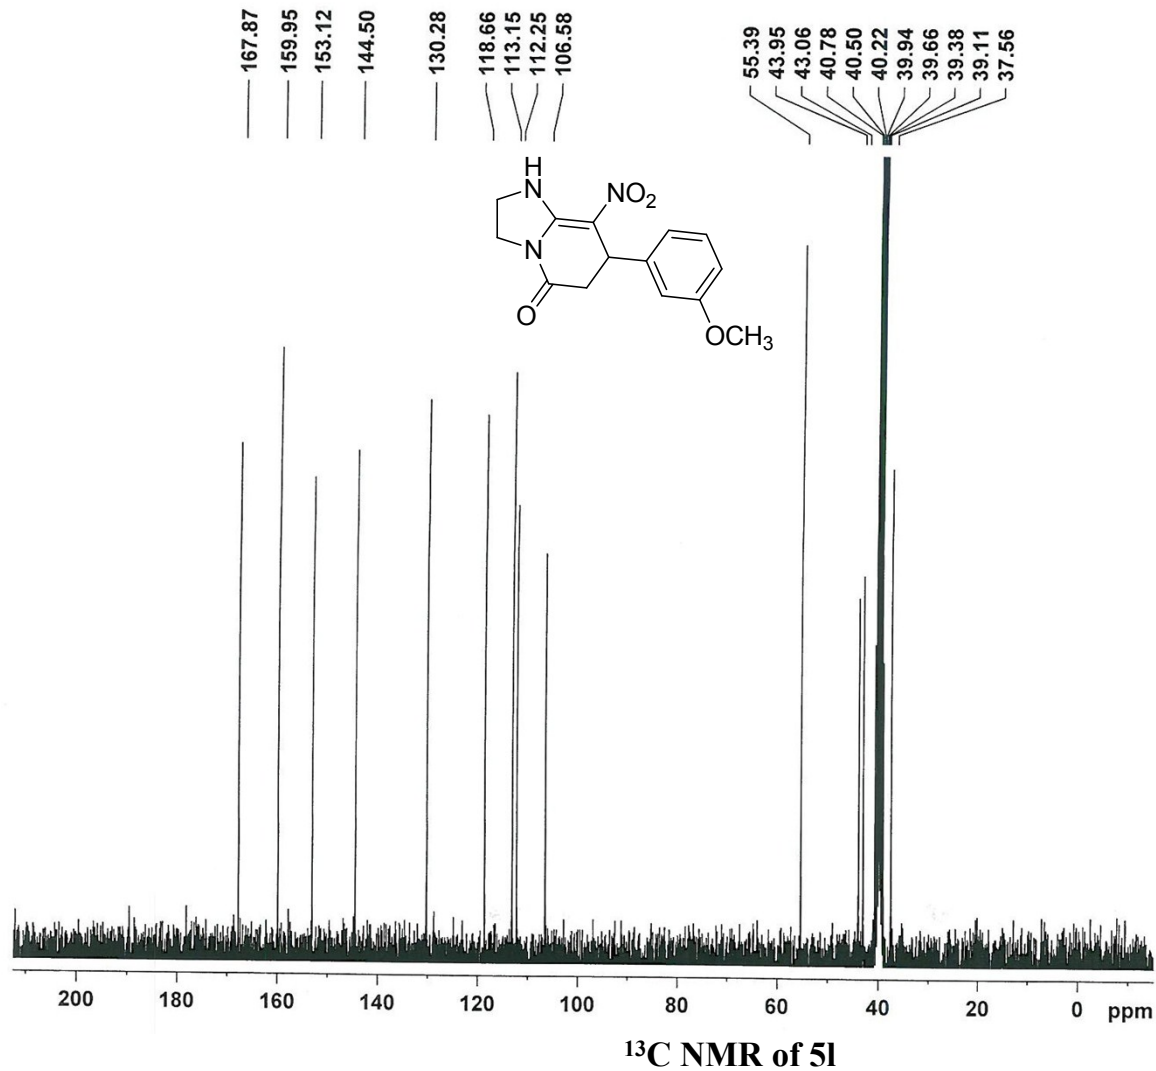

Current Data Parameters  
 NAME F.Hoseyni  
 EXPNO 804  
 PROCNO 1

F2 - Acquisition Parameters  
 Date\_ 20170831  
 Time\_ 9.06  
 INSTRUM spect  
 PROBHD 5 mm BBO BB-1H  
 PULPROG zgpg  
 TD 65536  
 SOLVENT DMSO  
 NS 850  
 DS 0  
 SWH 17985.611 Hz  
 FIDRES 0.274439 Hz  
 AQ 1.8219508 sec  
 RG 32768  
 DW 27.800 usec  
 DE 6.00 usec  
 TE 300.0 K  
 D1 2.0000000 sec  
 d11 0.0300000 sec  
 d12 0.00002000 sec

===== CHANNEL f1 =====  
 NUC1 13C  
 P1 14.00 usec  
 PL1 -6.00 dB  
 SFO1 75.4099117 MHz

===== CHANNEL f2 =====  
 CPDPRG2 waltz16  
 NUC2 1H  
 PCPD2 80.00 usec  
 PL2 3.00 dB  
 PL12 23.00 dB  
 PL13 23.00 dB  
 SFO2 299.8711995 MHz

F2 - Processing parameters  
 SI 32768  
 SF 75.4023710 MHz  
 WDW EM  
 SSB 0  
 LB 1.00 Hz

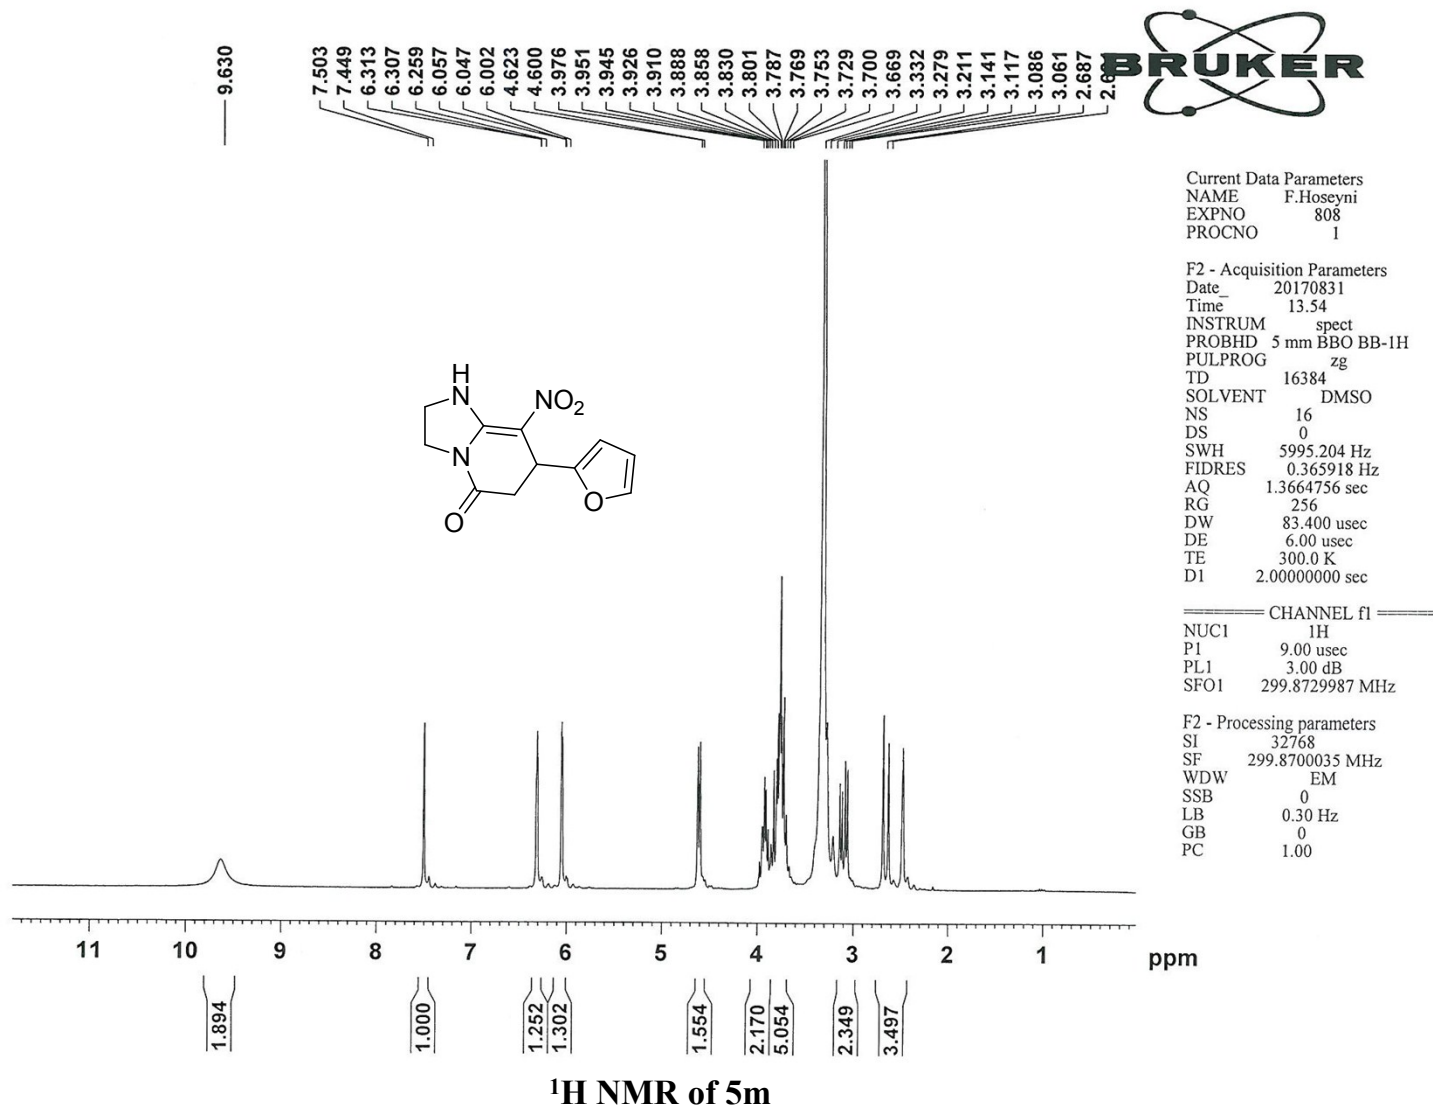

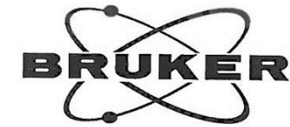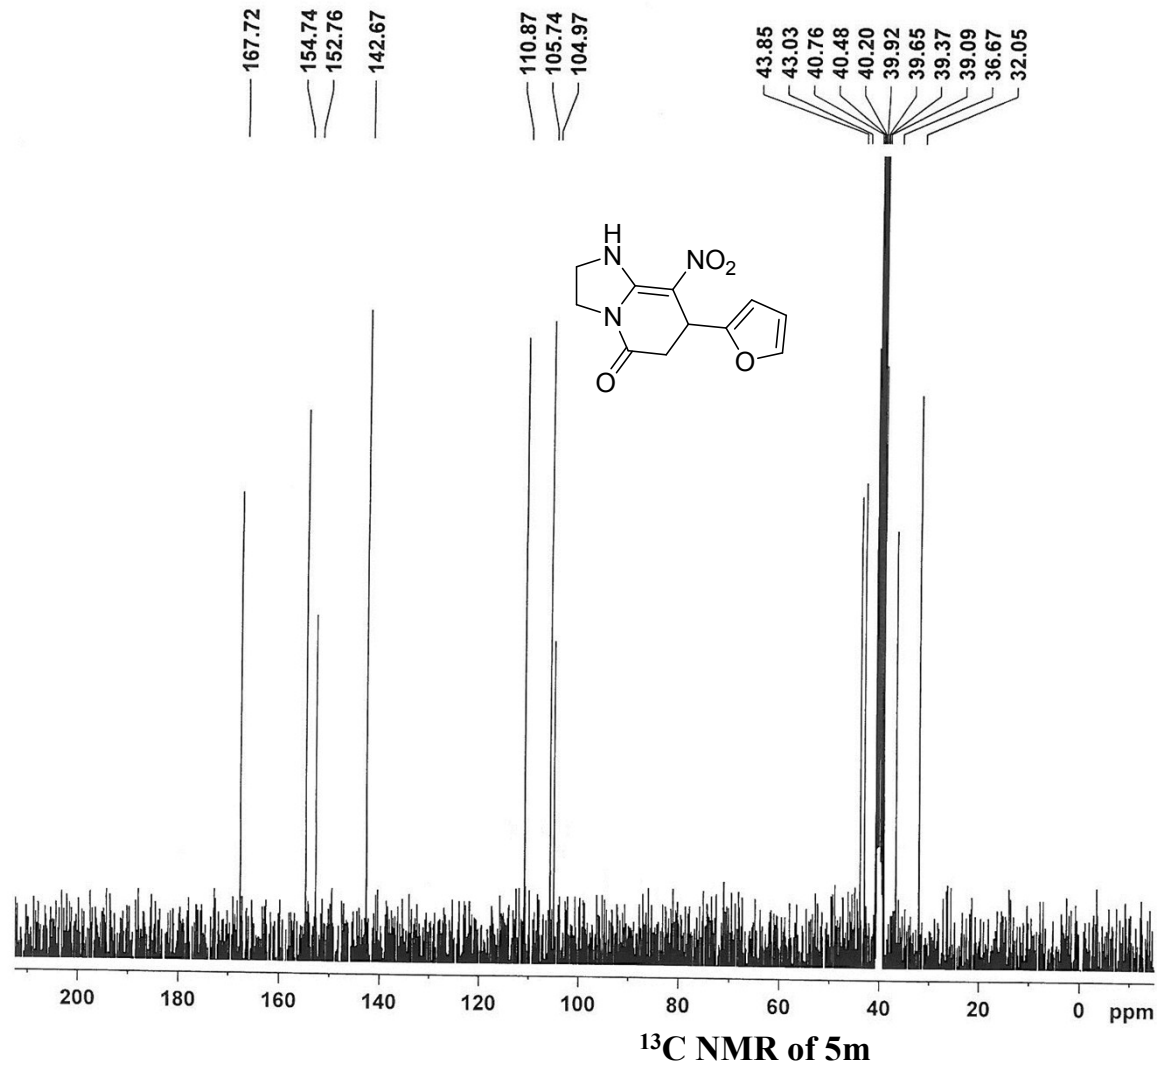

Current Data Parameters  
 NAME F.Hoseyni  
 EXPNO 810  
 PROCNO 1

F2 - Acquisition Parameters  
 Date\_ 20170902  
 Time\_ 8.58  
 INSTRUM spect  
 PROBHD 5 mm BBO BB-1H  
 PULPROG zgpg  
 TD 65536  
 SOLVENT DMSO  
 NS 751  
 DS 0  
 SWH 17985.611 Hz  
 FIDRES 0.274439 Hz  
 AQ 1.8219508 sec  
 RG 32768  
 DW 27.800 usec  
 DE 6.00 usec  
 TE 300.0 K  
 D1 2.00000000 sec  
 d11 0.03000000 sec  
 d12 0.00002000 sec

==== CHANNEL f1 =====  
 NUC1 13C  
 P1 14.00 usec  
 PL1 -6.00 dB  
 SFO1 75.4099117 MHz

==== CHANNEL f2 =====  
 CPDPRG2 waltz16  
 NUC2 1H  
 PCPD2 80.00 usec  
 PL2 3.00 dB  
 PL12 23.00 dB  
 PL13 23.00 dB  
 SFO2 299.8711995 MHz

F2 - Processing parameters  
 SI 32768  
 SF 75.4023710 MHz  
 WDW EM  
 SSB 0  
 LB 1.00 Hz

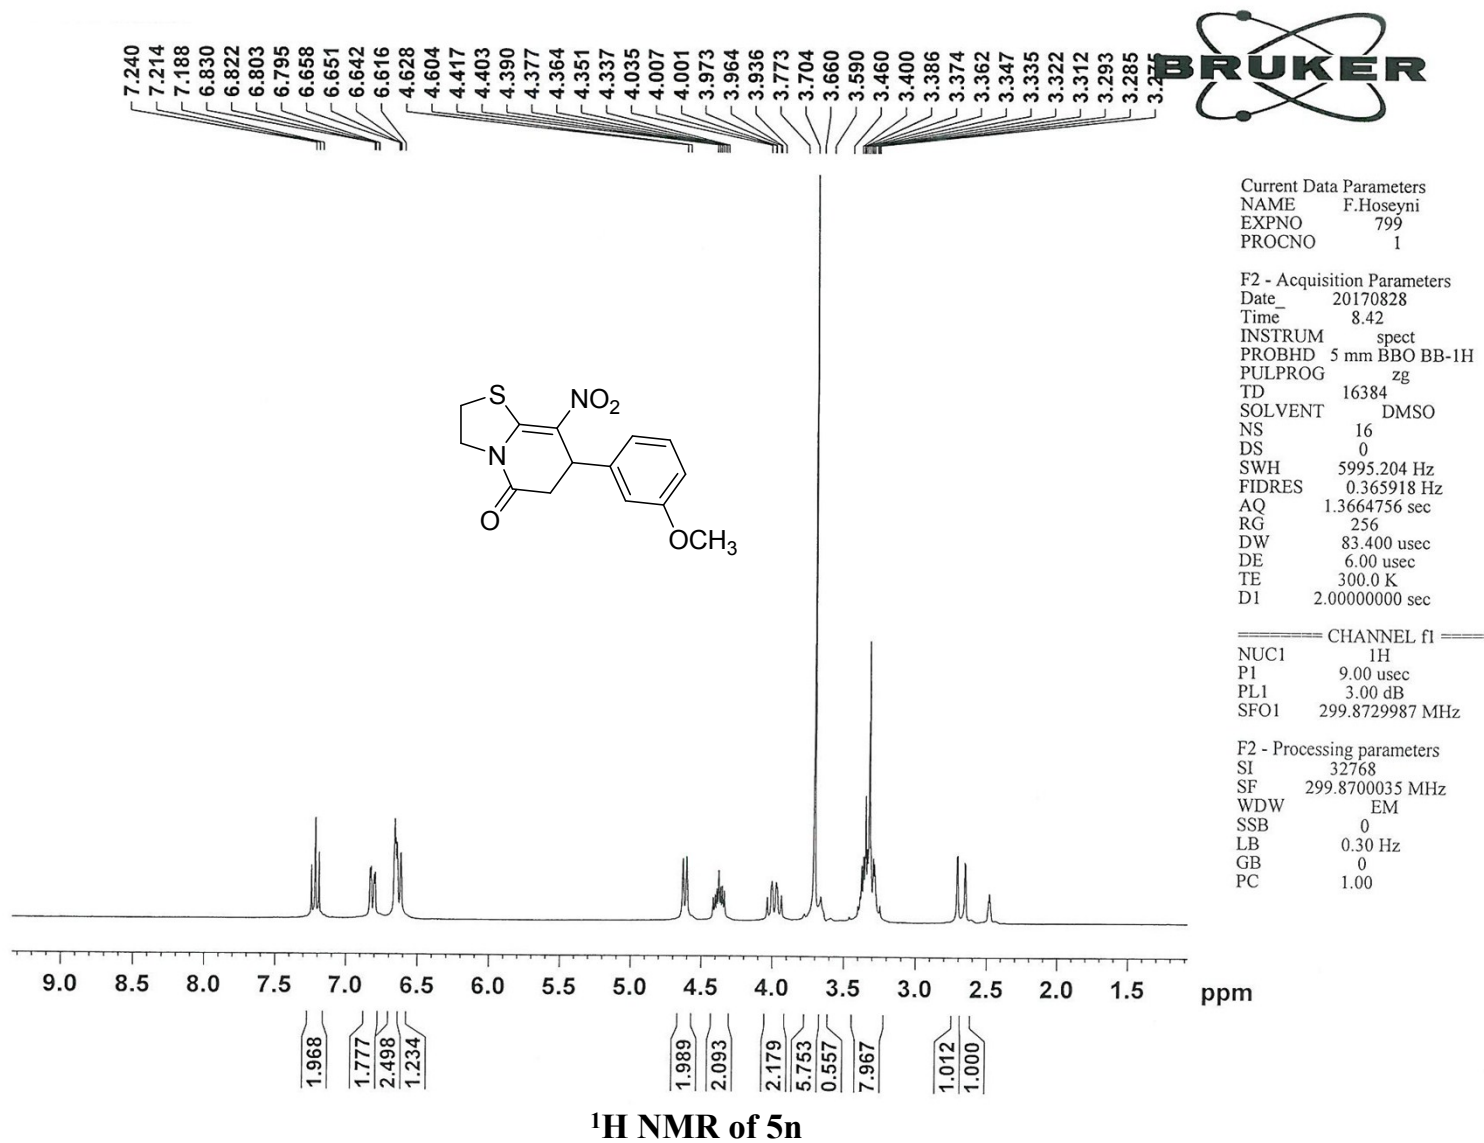

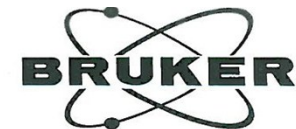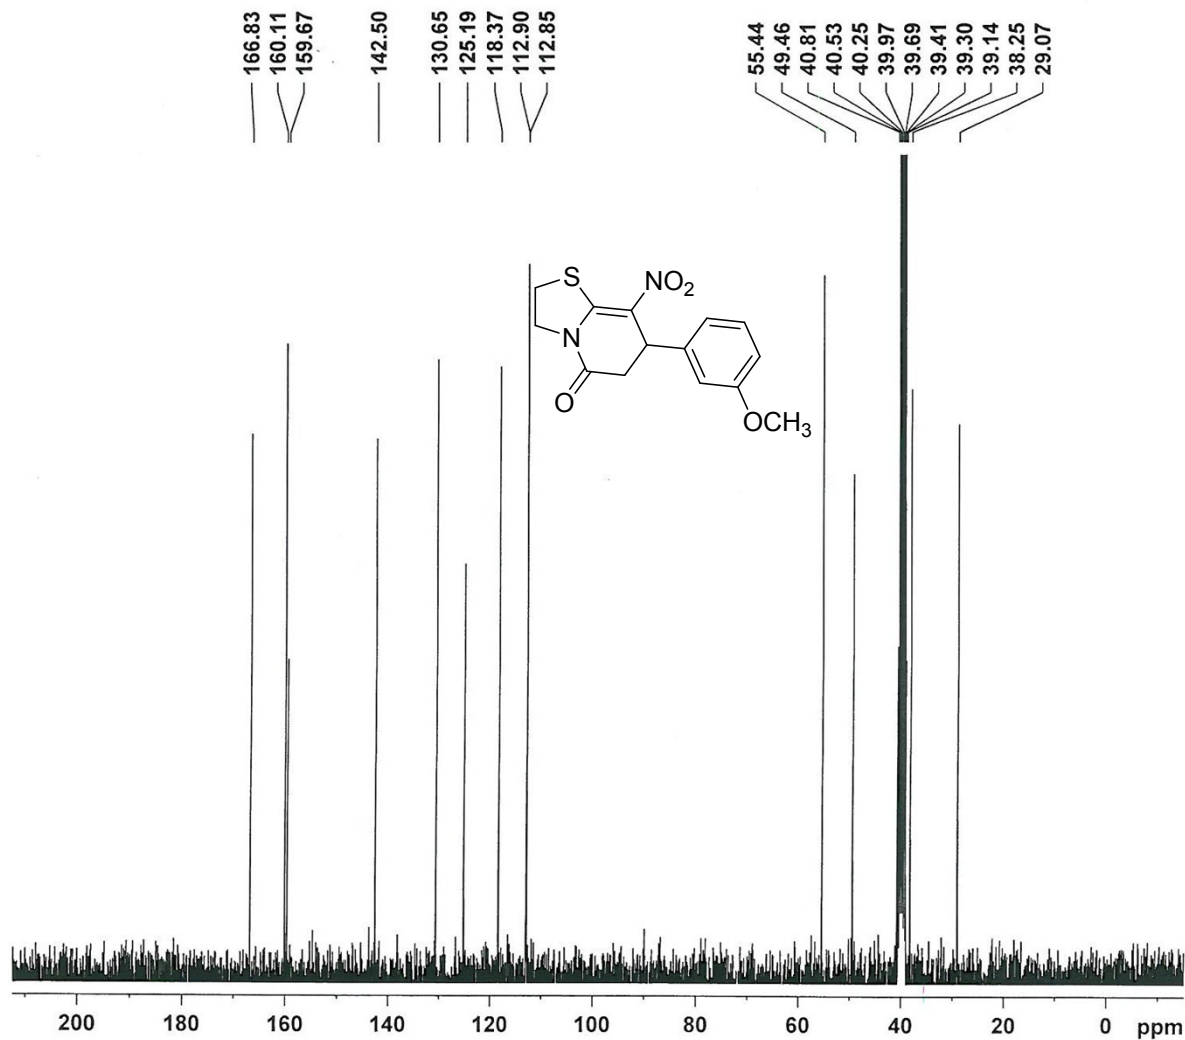 $^{13}\text{C}$  NMR of 5n

Current Data Parameters  
 NAME F.Hoseyni  
 EXPNO 806  
 PROCNO 1

F2 - Acquisition Parameters  
 Date\_ 20170831  
 Time\_ 11.02  
 INSTRUM spect  
 PROBHD 5 mm BBO BB-1H  
 PULPROG zgpg  
 TD 65536  
 SOLVENT DMSO  
 NS 850  
 DS 0  
 SWH 17985.611 Hz  
 FIDRES 0.274439 Hz  
 AQ 1.8219508 sec  
 RG 32768  
 DW 27.800 usec  
 DE 6.00 usec  
 TE 300.0 K  
 D1 2.0000000 sec  
 d11 0.0300000 sec  
 d12 0.00002000 sec

==== CHANNEL f1 =====  
 NUC1 13C  
 P1 14.00 usec  
 PL1 -6.00 dB  
 SFO1 75.4099117 MHz

==== CHANNEL f2 =====  
 CPDPRG2 waltz16  
 NUC2 1H  
 PCPD2 80.00 usec  
 PL2 3.00 dB  
 PL12 23.00 dB  
 PL13 23.00 dB  
 SFO2 299.8711995 MHz

F2 - Processing parameters  
 SI 32768  
 SF 75.4023710 MHz  
 WDW EM  
 SSB 0  
 LB 1.00 Hz  
 GB 0

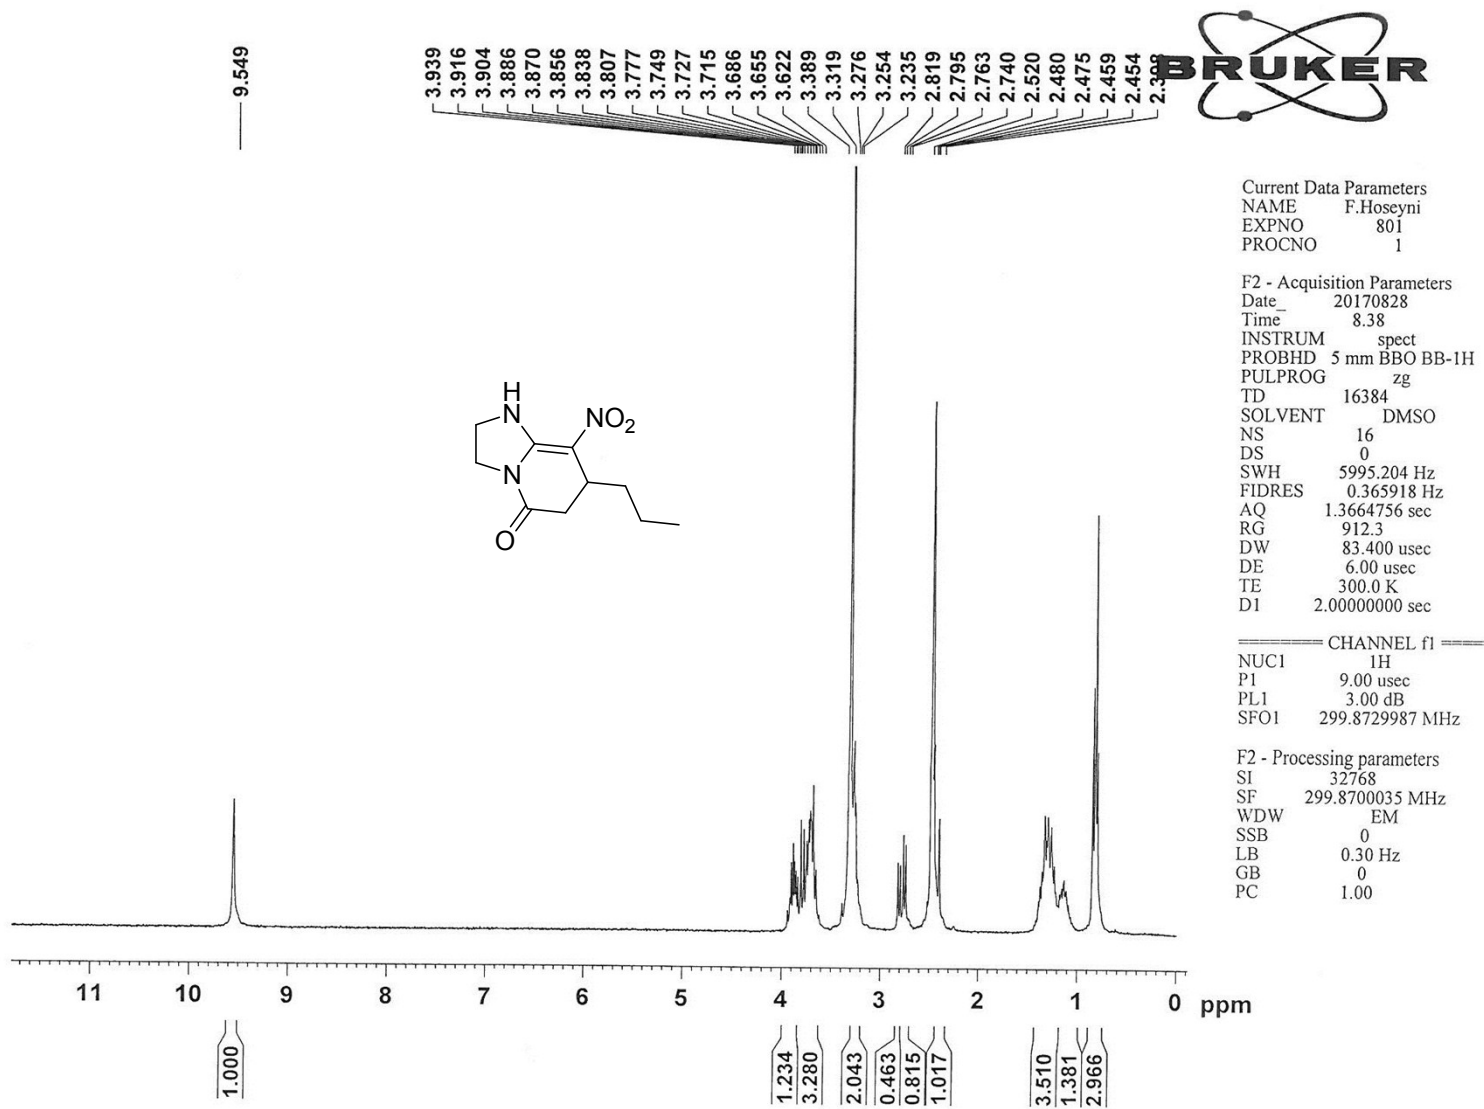<sup>1</sup>H NMR of 5o
